# Supplementary material for: Assessment of human diploid genome assembly with 10x Linked-Reads data
Source: PubMed Central journal article supplement (PMC6879002; doi:10.1093/gigascience/giz141), 2019-11-26
Supplement: giz141_giga-d-19-00092_original_submission.pdf [file giz141_giga-d-19-00092_original_submission.pdf]

|                                                                               |                                                                                                                                                                                                                                                                                                                                                                                                                                                                                                                                                                                                                                                                                                                                                                                                                                                                                                                                                                                                                                                                                                                                                                                                                                                                                                                                                                                                                                                                                                                                                                                                                                                                                                                                                                                                                                                            |
|-------------------------------------------------------------------------------|------------------------------------------------------------------------------------------------------------------------------------------------------------------------------------------------------------------------------------------------------------------------------------------------------------------------------------------------------------------------------------------------------------------------------------------------------------------------------------------------------------------------------------------------------------------------------------------------------------------------------------------------------------------------------------------------------------------------------------------------------------------------------------------------------------------------------------------------------------------------------------------------------------------------------------------------------------------------------------------------------------------------------------------------------------------------------------------------------------------------------------------------------------------------------------------------------------------------------------------------------------------------------------------------------------------------------------------------------------------------------------------------------------------------------------------------------------------------------------------------------------------------------------------------------------------------------------------------------------------------------------------------------------------------------------------------------------------------------------------------------------------------------------------------------------------------------------------------------------|
| <b>Manuscript Number:</b>                                                     | GIGA-D-19-00092                                                                                                                                                                                                                                                                                                                                                                                                                                                                                                                                                                                                                                                                                                                                                                                                                                                                                                                                                                                                                                                                                                                                                                                                                                                                                                                                                                                                                                                                                                                                                                                                                                                                                                                                                                                                                                            |
| <b>Full Title:</b>                                                            | Assessment of human diploid genome assembly with 10x Linked-Reads data                                                                                                                                                                                                                                                                                                                                                                                                                                                                                                                                                                                                                                                                                                                                                                                                                                                                                                                                                                                                                                                                                                                                                                                                                                                                                                                                                                                                                                                                                                                                                                                                                                                                                                                                                                                     |
| <b>Article Type:</b>                                                          | Data Note                                                                                                                                                                                                                                                                                                                                                                                                                                                                                                                                                                                                                                                                                                                                                                                                                                                                                                                                                                                                                                                                                                                                                                                                                                                                                                                                                                                                                                                                                                                                                                                                                                                                                                                                                                                                                                                  |
| <b>Funding Information:</b>                                                   |                                                                                                                                                                                                                                                                                                                                                                                                                                                                                                                                                                                                                                                                                                                                                                                                                                                                                                                                                                                                                                                                                                                                                                                                                                                                                                                                                                                                                                                                                                                                                                                                                                                                                                                                                                                                                                                            |
| <b>Abstract:</b>                                                              | <p>Background: Producing cost-effective haplotype-resolved personal genomes remains challenging. 10x Linked-Read sequencing, with its high base quality and long-range information, has been demonstrated to facilitate de novo assembly of human genomes and variant detection. In this study, we investigate in depth how the parameter space of 10x library preparation and sequencing affects assembly quality, on the basis of both simulated and real libraries.</p> <p>Findings: We prepared and sequenced eight 10x libraries with a diverse set of parameters from standard cell lines NA12878 and NA24385 and performed whole genome assembly on the data. We also developed the simulator LRTK-SIM to follow the workflow of 10x data generation and produce realistic simulated Linked-Read data sets. We found that assembly quality could be improved by increasing the total sequencing coverage (C) and keeping physical coverage of DNA fragments (CF) or read coverage per fragment (CR) within broad ranges. The optimal physical coverage was between 332X and 823X and assembly quality worsened if it increased to greater than 1,000X for a given C. Long DNA fragments could significantly extend phase blocks, but decreased contig contiguity. The optimal length-weighted fragment length (<math>W\mu\_FL</math>) was around 50 – 150kb. When broadly optimal parameters were used for library preparation and sequencing, ca. 80% of the genome was assembled in a diploid state.</p> <p>Conclusion: The Linked-Read libraries we generated and the parameter space we identified provide theoretical considerations and practical guidelines for personal genome assemblies based on 10x Linked-Read sequencing.</p> <p>Keywords: 10x Linked-Read sequencing, de novo assembly, diploid human genome, library preparation</p> |
| <b>Corresponding Author:</b>                                                  | arend sidow<br><br>UNITED STATES                                                                                                                                                                                                                                                                                                                                                                                                                                                                                                                                                                                                                                                                                                                                                                                                                                                                                                                                                                                                                                                                                                                                                                                                                                                                                                                                                                                                                                                                                                                                                                                                                                                                                                                                                                                                                           |
| <b>Corresponding Author Secondary Information:</b>                            |                                                                                                                                                                                                                                                                                                                                                                                                                                                                                                                                                                                                                                                                                                                                                                                                                                                                                                                                                                                                                                                                                                                                                                                                                                                                                                                                                                                                                                                                                                                                                                                                                                                                                                                                                                                                                                                            |
| <b>Corresponding Author's Institution:</b>                                    |                                                                                                                                                                                                                                                                                                                                                                                                                                                                                                                                                                                                                                                                                                                                                                                                                                                                                                                                                                                                                                                                                                                                                                                                                                                                                                                                                                                                                                                                                                                                                                                                                                                                                                                                                                                                                                                            |
| <b>Corresponding Author's Secondary Institution:</b>                          |                                                                                                                                                                                                                                                                                                                                                                                                                                                                                                                                                                                                                                                                                                                                                                                                                                                                                                                                                                                                                                                                                                                                                                                                                                                                                                                                                                                                                                                                                                                                                                                                                                                                                                                                                                                                                                                            |
| <b>First Author:</b>                                                          | Lu Zhang                                                                                                                                                                                                                                                                                                                                                                                                                                                                                                                                                                                                                                                                                                                                                                                                                                                                                                                                                                                                                                                                                                                                                                                                                                                                                                                                                                                                                                                                                                                                                                                                                                                                                                                                                                                                                                                   |
| <b>First Author Secondary Information:</b>                                    |                                                                                                                                                                                                                                                                                                                                                                                                                                                                                                                                                                                                                                                                                                                                                                                                                                                                                                                                                                                                                                                                                                                                                                                                                                                                                                                                                                                                                                                                                                                                                                                                                                                                                                                                                                                                                                                            |
| <b>Order of Authors:</b>                                                      | Lu Zhang<br>Xin Zhou<br>Ziming Weng<br>arend sidow                                                                                                                                                                                                                                                                                                                                                                                                                                                                                                                                                                                                                                                                                                                                                                                                                                                                                                                                                                                                                                                                                                                                                                                                                                                                                                                                                                                                                                                                                                                                                                                                                                                                                                                                                                                                         |
| <b>Order of Authors Secondary Information:</b>                                |                                                                                                                                                                                                                                                                                                                                                                                                                                                                                                                                                                                                                                                                                                                                                                                                                                                                                                                                                                                                                                                                                                                                                                                                                                                                                                                                                                                                                                                                                                                                                                                                                                                                                                                                                                                                                                                            |
| <b>Additional Information:</b>                                                |                                                                                                                                                                                                                                                                                                                                                                                                                                                                                                                                                                                                                                                                                                                                                                                                                                                                                                                                                                                                                                                                                                                                                                                                                                                                                                                                                                                                                                                                                                                                                                                                                                                                                                                                                                                                                                                            |
| <b>Question</b>                                                               | <b>Response</b>                                                                                                                                                                                                                                                                                                                                                                                                                                                                                                                                                                                                                                                                                                                                                                                                                                                                                                                                                                                                                                                                                                                                                                                                                                                                                                                                                                                                                                                                                                                                                                                                                                                                                                                                                                                                                                            |
| Are you submitting this manuscript to a special series or article collection? | No                                                                                                                                                                                                                                                                                                                                                                                                                                                                                                                                                                                                                                                                                                                                                                                                                                                                                                                                                                                                                                                                                                                                                                                                                                                                                                                                                                                                                                                                                                                                                                                                                                                                                                                                                                                                                                                         |

|                                                                                                                                                                                                                                                                                                                                                                                                                                                                                                                                                         |            |
|---------------------------------------------------------------------------------------------------------------------------------------------------------------------------------------------------------------------------------------------------------------------------------------------------------------------------------------------------------------------------------------------------------------------------------------------------------------------------------------------------------------------------------------------------------|------------|
| <p><b>Experimental design and statistics</b></p> <p>Full details of the experimental design and statistical methods used should be given in the Methods section, as detailed in our <a href="#">Minimum Standards Reporting Checklist</a>. Information essential to interpreting the data presented should be made available in the figure legends.</p> <p>Have you included all the information requested in your manuscript?</p>                                                                                                                      | <p>Yes</p> |
| <p><b>Resources</b></p> <p>A description of all resources used, including antibodies, cell lines, animals and software tools, with enough information to allow them to be uniquely identified, should be included in the Methods section. Authors are strongly encouraged to cite <a href="#">Research Resource Identifiers</a> (RRIDs) for antibodies, model organisms and tools, where possible.</p> <p>Have you included the information requested as detailed in our <a href="#">Minimum Standards Reporting Checklist</a>?</p>                     | <p>Yes</p> |
| <p><b>Availability of data and materials</b></p> <p>All datasets and code on which the conclusions of the paper rely must be either included in your submission or deposited in <a href="#">publicly available repositories</a> (where available and ethically appropriate), referencing such data using a unique identifier in the references and in the “Availability of Data and Materials” section of your manuscript.</p> <p>Have you have met the above requirement as detailed in our <a href="#">Minimum Standards Reporting Checklist</a>?</p> | <p>Yes</p> |

[Click here to view linked References](#)

1 **Assessment of human diploid genome assembly with 10x**

2 **Linked-Reads data**

3 **Lu Zhang<sup>1,2,3,\*</sup>, Xin Zhou<sup>3,\*</sup>, Ziming Weng<sup>2</sup>, Arend Sidow<sup>2,4,†</sup>**

4 <sup>1</sup>Department of Computer Science, Hong Kong Baptist University

5 <sup>2</sup>Department of Pathology, Stanford University

6 <sup>3</sup>Department of Computer Science, Stanford University

7 <sup>4</sup>Department of Genetics, Stanford University

8 \*These authors contributed equally to this work. †Correspondence and requests for materials should be  
9 addressed to Arend Sidow (email: arend@stanford.edu)

## 10 **Abstract**

11 **Background:** Producing cost-effective haplotype-resolved personal genomes remains  
12 challenging. 10x Linked-Read sequencing, with its high base quality and long-range information,  
13 has been demonstrated to facilitate *de novo* assembly of human genomes and variant detection.  
14 In this study, we investigate in depth how the parameter space of 10x library preparation and  
15 sequencing affects assembly quality, on the basis of both simulated and real libraries.

16 **Findings:** We prepared and sequenced eight 10x libraries with a diverse set of parameters from  
17 standard cell lines NA12878 and NA24385 and performed whole genome assembly on the data.  
18 We also developed the simulator LRTK-SIM to follow the workflow of 10x data generation and  
19 produce realistic simulated Linked-Read data sets. We found that assembly quality could be  
20 improved by increasing the total sequencing coverage ( $C$ ) and keeping physical coverage of DNA  
21 fragments ( $C_F$ ) or read coverage per fragment ( $C_R$ ) within broad ranges. The optimal physical  
22 coverage was between 332X and 823X and assembly quality worsened if it increased to greater  
23 than 1,000X for a given  $C$ . Long DNA fragments could significantly extend phase blocks, but  
24 decreased contig contiguity. The optimal length-weighted fragment length ( $W\mu_{FL}$ ) was around 50  
25 – 150kb. When broadly optimal parameters were used for library preparation and sequencing, ca.  
26 80% of the genome was assembled in a diploid state.

27 **Conclusion:** The Linked-Read libraries we generated and the parameter space we identified  
28 provide theoretical considerations and practical guidelines for personal genome assemblies  
29 based on 10x Linked-Read sequencing.

30 **Keywords:** 10x Linked-Read sequencing, *de novo* assembly, diploid human genome, library  
31 preparation

## 32 **Data description**

### 33 **Introduction**

34 The human genome holds the key for understanding the genetic basis of human evolution,  
35 hereditary illnesses and many phenotypes. Whole-genome reconstruction and variant discovery,  
36 accomplished by analysis of data from whole-genome sequencing experiments, are foundational  
37 for the study of human genomic variation and analysis of genotype-phenotype relationships. Over  
38 the past decades, cost-effective whole-genome sequencing has been revolutionized by short-  
39 fragment approaches, the most widespread of which have been the consistently improving  
40 generations of the original Solexa technology [1, 2], now referred to as Illumina sequencing.  
41 Illumina's strengths and weaknesses are inherent in the sample prep and sequencing chemistry.  
42 Illumina generates short paired reads (2x150 base pairs for the highest-throughput platforms)  
43 from short fragments (usually 400-500 base pairs) [3]. Because many clonally amplified molecules  
44 generate a robust signal during the sequencing reaction, Illumina's average per-base error rates  
45 are very low.

46

47 The lack of long-range contiguity between end-sequenced short fragments limits their application  
48 for reconstructing personal genomes. Long-range contiguity is important for phasing variants and  
49 dealing with genomic complex regions. For haplotyping, variants can be phased by population-  
50 based methods [4, 5] or family-based recombination inference [6, 7], but such approaches are  
51 only feasible for common variants or large pedigrees. Furthermore, highly polymorphic regions  
52 such as the HLA in which the reference sequence does not adequately capture the diversity  
53 segregating in the population are refractory to mapping-based approaches and require *de novo*  
54 assembly to reconstruct [8]. Short-read/short-fragment data are challenged by interspersed  
55 repetitive sequences from mobile elements and by segmental duplications, and only support  
56 highly fragmented genome reconstruction [9, 10].

57

58 In principle, many of these challenges can be overcome by long-read/long-fragment sequencing  
59 [11, 12]. Assembly of Pacific Biosciences (PacBio) or Oxford Nanopore (ONT) data can yield  
60 impressive contiguity of contigs and scaffolds. In one study, scaffold N50 reached 31.1Mb by  
61 hierarchically integrating PacBio long reads and BioNano for a hybrid assembly, which also  
62 uncovered novel tandem repeats and replicated the structural variants that were newly included  
63 in the updated hg38 human reference sequence. Another study [13] produced human genome  
64 assemblies with ONT data, in which a contig N50 ~3Mb was achieved, and long contigs covered  
65 all class I HLA regions. However, long-fragment sequencing suffers from low throughput, high  
66 cost, and low base quality, hampering its usefulness for personal genome assembly.

67

68 Hierarchical assembly pipelines in which multiple data types are used [14] as another approach.  
69 For example, in the reconstruction of an Asian personal genome, fosmid clone pools and Illumina  
70 data were merged, but because fosmid libraries are highly labor intensive to generate and  
71 sequence, this approach is not generalizable to personal genomes. The "Long Fragment Read"  
72 (LFR) approach, where a long fragment is sequenced at high depth via single-molecule  
73 fragmented amplification, reported promising personal genome assembly and variant phasing by  
74 attaching a barcode to the short reads derived from the same long fragment. However, because  
75 LFR is implemented in a 384 well plate, many long fragments would be labelled by the same  
76 barcodes, making it difficult for binning short-reads, and the great sequencing depth required  
77 rendered LFR not cost-effective.

78

79 An alternative approach is offered by the 10x Genomics Chromium system, which distributes the  
80 DNA prep into millions of partitions where partition-specific barcode sequences are attached to  
81 short amplification products that are templated off the input fragments. Because of the limited  
82 reaction efficiency in each partition, the sequencing depth for each fragment is too shallow to

83 reconstruct the original long-fragment, distinguishing this approach from LFR [15]. However, to  
84 compensate for the low read coverage of each fragment, each genomic region is covered by  
85 hundreds of DNA fragments, giving overall sequence coverage that is in a range comparable to  
86 standard Illumina short-fragment sequencing while providing very high physical coverage. Novel  
87 computational approaches leveraging the special characteristics of 10x Genomics data have  
88 already generated significant advances in power and accuracy of haplotyping [16, 17], cancer  
89 genome reconstruction [18, 19], metagenomic assemblies [20], and *de novo* assembly of human  
90 and other genomes [21-23], compared to standard Illumina short-fragment sequencing. While the  
91 uniformity of sequence coverage is not as good as with PCR-free Illumina libraries, 10x Linked-  
92 Read sequencing is a promising technology that combines low per-base error and good small-  
93 variant discovery with long-range information for much improved SV detection in mapping-based  
94 approaches [19, 24], and the possibility of long-range contiguity in *de novo* assembly [21, 23, 25].  
95  
96 Practical advantages of the technology include the low DNA input mass requirement (1ng per  
97 library, or approximately 300 haploid human genome equivalents). Real input quantities can vary,  
98 along with other factors, to influence an interconnected array of parameters that are relevant to  
99 genome assembly and reconstruction. The parameters over which the experimenter has influence  
100 are (**Figure 1**): i).  $C_R$ : average Coverage of short Reads per fragment; ii).  $C_F$ : average physical  
101 Coverage of the genome by long DNA Fragments; iii).  $N_{F/P}$ : Number of Fragments per Partition;  
102 iv). Fragment length distribution, several parameters of which are used, specifically  $\mu_{FL}$ : Average  
103 Unweighted DNA Fragment Length and  $W\mu_{FL}$ : Length-Weighted average of DNA Fragment  
104 Length. Note that several parameters depend on each other. For example, a greater amount of  
105 input DNA will increase  $N_{F/P}$ ; shorter fragments increase  $N_{F/P}$  at the same DNA input amount  
106 compared to longer fragments; less input DNA will (within practical constraints) increase  $C_R$  and  
107 decrease  $C_F$ ; and their absolute values are set by how much total sequence coverage is  
108 generated because  $C_R \times C_F = C$ .

109

110 Our goal in this study was to experimentally explore the 10x parameter space and evaluate the  
111 quality of *de novo* diploid assembly as a function of the parameter values. For example, we set  
112 out to ask whether longer input fragments produce better assemblies, or what the effect of  
113 sequencing vs. physical coverage is on contiguity of assembly. In order to constrain the parameter  
114 space, we first performed computer simulations with reasonably realistic synthetic data. The  
115 simulation results suggested certain parameter combinations that we then approximated in the  
116 generation of real, high-depth, sequence data on two human reference genome cell lines,  
117 NA12878 and NA24385. These simulated and real data sets were then used to produce *de novo*  
118 assemblies, with an emphasis on the performance of 10x's Supernova2 [21]. We finally assessed  
119 the quality of the assemblies using standard metrics of contiguity and accuracy, facilitated by the  
120 existence of a gold standard (in the case of simulations) and comparisons to the reference  
121 genome (in the case of real data).

122

### 123 **Library preparation, physical parameters and sequencing coverage**

124 We made six DNA preparations that varied in fragment size distribution and amount of input DNA,  
125 three each from NA12878 and NA24385. From these, we prepared eight libraries, five from  
126 NA12878 and three from NA24385 (**Table S1**). To generate library  $L_{1L}$ ,  $L_{1M}$  and  $L_{1H}$ , genomic  
127 DNA was extracted from ca. 1 million cultured NA12878 cells using the Gentra Puregene Blood  
128 Kit following manufacturer's instructions (Qiagen, Cat. No 158467). The GEMs were divided into  
129 3 tubes with 5%, 20%, and 75% to generate libraries  $L_{1L}$ ,  $L_{1M}$  and  $L_{1H}$ , respectively (**Figure S1-**  
130 **S3**). For the other libraries, to generate longer DNA fragments ( $W_{\mu_{FL}}=150\text{kb}$  and longer, **Figure**  
131 **S4-S8**), a modified protocol was applied. Two-hundred thousand NA12878 or NA24385 cells of  
132 fresh culture were added to 1mL cold 1x PBS in a 1.5 ml tube and pelleted for 5 minutes at 300g.  
133 The cell pellets were completely resuspended in the residual supernatant by vortexing and then



134 lysed by adding 200ul Cell Lysis Solution and 1ul of RNaseA Solution (Qiagen, Cat. No 158467),  
135 mixing by gentle inversion, and incubating at 37°C for 15-30 minutes. This cell lysis solution is  
136 used immediately as input for the 10x Chromium prep (Chromium™ Genome Library & Gel Bead  
137 Kit v2, PN-120258; Chromium™ i7 Multiplex Kit, PN-120262). Fragment size of the input DNA  
138 can be controlled by gentle handling during lysis and DNA preparation for Chromium. The amount  
139 of input DNA (between 1.25 and 4 ng) was varied to achieve a wide range of physical coverage  
140 ( $C_F$ ). The Chromium Controller was operated and the GEM prep was performed as instructed by  
141 the manufacturer. Individual libraries were then constructed by end repairing, A-tailing, adapter  
142 ligation and PCR amplification. All libraries were sequenced with three lanes of paired-end 150bp  
143 runs on the Illumina HiSeqX to obtain very high coverage ( $C=94x-192x$ ), though the two with the  
144 fewest number of gel beads ( $L_{1L}$  and  $L_{1M}$ ) exhibited high PCR duplication rates because of the  
145 reduced complexity of the libraries (**Table S1**).

146

### 147 **Linked-Reads subsampling**

148 The high sequencing coverage in the libraries allowed subsampling to facilitate the matching of  
149 parameters among the different libraries, for purposes of comparability; these subsampled  
150 Linked-Read sets are denoted  $R_{id}$  (**Figure 1**). We aligned the 10x Linked-Reads to human  
151 reference genome (hg38) followed by removing PCR duplication by barcode-aware analysis in  
152 Long Ranger[18]. Original input DNA fragments were inferred by collecting the read-pairs with the  
153 same barcode that were aligned in proximity to each other. A fragment was terminated if the  
154 distance between two consecutive reads with the identical barcode larger than 50kb. Fragments  
155 were required to have at least two read pairs with the same barcode and a length of at least 2 kb.  
156 Partitions with fewer than three fragments were removed. We subsampled short-reads for each  
157 fragment to satisfy the expected  $C_R$ .

158

## 159 **Generating 10x simulated libraries by LRTK-SIM**

160 To compare the observations from real data with a known truth set, we developed LRTK-SIM, a  
161 simulator that follows the workflow of the 10x Chromium system and generates synthetic Linked-  
162 Reads like those produced by an Illumina HiSeqX machine (**Supplementary Information** and  
163 **Figure S9**). Based on the parameters commonly employed by 10x Genomics Linked-Read  
164 sequencing and the characteristics of our libraries, LRTK-SIM generated simulated datasets from  
165 the human reference (hg38), explicitly modeling the five key steps in real data generation.  
166 Parameters in parentheses are from the standard 10x Genomics protocol: 1. Shearing genomic  
167 DNA into long fragments ( $W_{\mu_{FL}}$  from 50kb to 100kb); 2. Loading DNA to the 10x Chromium  
168 instrument (~1.25ng DNA); 3. Allocating DNA fragments into partitions which are attached the  
169 unique barcodes (~10 fragments per partition); 4. Generating short fragments; 5. Generating  
170 Illumina paired-end short reads (800M~1200M reads). LRTK-SIM first generated a diploid  
171 reference genome as a template by duplicating the human reference genome (hg38) into two  
172 haplotypes and inserting SNVs from high-confidence regions in GIAB of NA12878; For low-  
173 confidence regions we randomly simulated 1 SNV per 1 kb. The ratio was 2:1 for heterozygous  
174 and homozygous SNVs. From this diploid reference genome, LRTK-SIM generated long DNA  
175 fragments by randomly shearing each haplotype with multiple copies into pieces whose lengths  
176 were sampled from an exponential distribution with mean of  $\mu_{FL}$ . These fragments were then  
177 allocated to pseudo-partitions, and all the fragments within each partition were assigned the same  
178 barcode. The number of fragments for each partition was randomly picked from a Poisson  
179 distribution with mean of  $N_{F/P}$ . Finally, paired-end short reads were generated according to  $C_R$  and  
180 replaced the first 16bp of the reads from forward strand to the assigned barcodes followed by 7  
181 Ns. More information about implementation can be found in **Supplementary Information**. From  
182 that diploid genome, Linked-Read datasets were generated that varied in  $C_R$ ,  $C_F$  and  $\mu_{FL}$  ( $W_{\mu_{FL}}$ )  
183 (**Table S2-S3**). Varying  $N_{F/P}$  was only done for chromosome 19 because of the infeasibility of

184 running Supernova2 on whole genome assemblies with large  $N_{FP}$ ; within practically reasonable  
185 values,  $N_{FP}$  does not appear to influence assembly quality (**Figure S10**). In total, we generated  
186 17 simulated Linked-Read datasets to explore the overall parameter space (**Table S2-S3**) and 11  
187 to match the parameters of the abovementioned real libraries (**Figure 1**).

188

## 189 **Human genome diploid assembly and evaluation**

190 The scaffolds were generated by the “pseudohap2” output of Supernova2, which explicitly  
191 generated two haploid scaffolds, simultaneously. Contigs were generated by breaking the  
192 scaffolds if at least 10 consecutive ‘N’s appeared, per definition by Supernova2. For the  
193 simulations of human chromosome 19, we used the scaffolds from the “megabubbles” output.  
194 Contig and scaffold N50 and NA50 were used to evaluate assembly quality. Contigs longer than  
195 500bp were aligned to hg38 by Minimap2[30]. We calculated contig NA50 on the basis of contig  
196 misassemblies reported by QUAST-LG [31]. For scaffolds (longer than 1kb), we calculated the  
197 NA50 following Assemblathon 1's procedure [32] (**Supplementary Information**).

198

199 **Performance of diploid assembly: influence of total coverage** Diploid assembly by Linked-  
200 Reads requires sufficient total read coverage ( $C=C_R \times C_F$ ) to generate long contigs and scaffolds.  
201 In this experiment, to explore the roles of both physical coverage ( $C_F$ ) and per-fragment read  
202 coverage ( $C_R$ ), we first generated eight simulated libraries whose total coverage  $C$  ranged from  
203 16x to 78x: four with  $C_R$  fixed and increasing  $C_F$  and four with fixed  $C_F$ , and increasing  $C_R$  (**Table**  
204 **S2**). Contig and scaffold N50s increased along with increasing either  $C_F$  or  $C_R$  (**Figure 2A** and  
205 **2B**). To investigate whether the trend was also present in the real datasets, we analyzed six real  
206 libraries (three by varying  $C_F$ , and the other three by varying  $C_R$ ; **Figure 1**): as  $C$  increased, we  
207 varied  $C_F$  and  $C_R$  independently by fixing the other parameter. Contig and scaffold N50s also  
208 increased in in these real Linked-Read sets (**Figure 2C, 2D, 2E** and **2F**) as a function of total

209 coverage  $C$ . Contig lengths did increase but not dramatically so when  $C$  was increased beyond  
210 56X. Accuracy, which we define as the ratio between NA50 (N50 after breaking contigs or  
211 scaffolds at assembly errors) and N50 (**Figure 2C** and **2E**), did not change appreciably. For  
212 scaffolds in the real data sets, when  $C$  increased from 48X ( $R_3$ ) to 67X ( $R_4$ ), both scaffold N50  
213 and NA50 were significantly improved (N50: 13.4Mb to 30.6Mb; NA50: 6.3Mb to 12.0Mb), but the  
214 accuracy dropped slightly from 46.6% to 39.1%, which indicated that scaffold accuracy may be  
215 refractory to extremely high  $C$  (**Figure 2F**). These results indicated that assembly length and  
216 accuracy were comparable over a broad range of  $C_F$  and  $C_R$  at constant  $C$ , which implied that  
217 assembly quality was mainly determined by  $C$ .

218

219 **Performance of diploid assembly: influence of fragment length and physical coverage.** To  
220 investigate if input weighted fragment length (as measured by  $W_{\mu_{FL}}$ ) influenced assembly quality,  
221 we generated four simulated libraries (**Table S3**) with fixed  $C_F$  and  $C_R$  and a range of fragment  
222 lengths (**Figure 3A**). Contig length decreased with increasing fragment length, a trend that was  
223 also seen in six real libraries (**Figure 3B**;  $C=56X$ ;  $R_6$  to  $R_{11}$  in **Figure 1**). We then simulated  
224 another six libraries with the same parameters as the real ones to explore the effects of physical  
225 coverage at constant  $C=56x$  (**Figure 3C**). Contig lengths decreased as a function of increasing  
226 physical coverage, a trend that is somewhat less clear in real data possibly due to confounding  
227 other parameters such as fragment length (**Figure 3D**).

228

229 **Performance of diploid assembly: nature of the source genome.** Assembly errors may occur  
230 because of heterozygosity, repetitive sequences, or sequencing error. To illuminate possible  
231 sources of assembly error, we performed simulations by generating 10x-like Linked-Reads as  
232 above from human chromosome 19, and then quantified assembly error against these synthetic  
233 gold standards. Removal of interspersed repeat sequences from the source genome resulted in

234 better contigs with no loss of accuracy in experiments by varying  $C_F$ ,  $C_R$  and  $\mu_{FL}$  (**Figure 4A, 4C**  
235 and **4E**) and better scaffolds only if  $C_R$  was above 1X (**Figure 4D**). Removal of variation had little  
236 effect on contigs and only gave rise to longer scaffolds if  $C_R$  was above 0.8X (**Figure S11**), which  
237 is difficult to achieve with real libraries. Finally, a 1% uniform sequencing error had no discernible  
238 effect (**Figure S12**).

239

240 **Performance of diploid assembly: fraction of genome in diploid state.** While contiguity is an  
241 important parameter for any whole genome assembly, evaluation of diploid assemblies  
242 necessitates estimating the fraction of the genome in which the assembly recovered the diploid  
243 state. To this end, we divided the contigs generated by Supernova2 into “diploid contigs”, which  
244 were extracted from its megabubble structures, and “haploid contigs” from non-megabubble  
245 structures. Pairs of scaffolds were extracted as the two haplotypes from megabubble structures  
246 if they shared the same start and end nodes in the assembly graph. Diploid contigs were  
247 generated by breaking the candidate scaffolds at the sequences with least 10 consecutive ‘N’s  
248 and were aligned to human reference genome (hg38) by Minimap2. The genome was split into  
249 500bp windows and diploid regions were defined as the maximum extent of successive windows  
250 covered by two contigs, each from one haplotype. Alignment against the human reference  
251 genome revealed the overall genome coverages of the six assemblies to be around 91%. For  
252 most assemblies, 70%-80% of the genome was covered by two homologous contigs (**Table 1**),  
253 with  $R_6$  only reaching 58.9%, probably due to the short fragments of the DNA prep ( $\mu_{FL}=24\text{kb}$ ). We  
254 also analyzed another seven assemblies produced by 10x Genomics, all of which had diploid  
255 fractions of about 80% as well (**Table S4**). In the male NA24385, non-pseudoautosomal regions  
256 of the X chromosome are hemizygous and should therefore be recovered as haploid regions.  
257 Between 79.9% and 87.6% of these regions were covered by one contig exactly depending on  
258 the assembled library. Library construction parameters other than fragment length appeared to  
259 have had little impact on the proportion of diploid regions (**Tables 1 and Table S4**).

260

261 Overlapping the diploid regions from the assemblies of the same individual revealed that 50.24%  
262 and 67.27% of the genome for NA12878 and NA24385 (**Figure S13**), respectively, were diploid  
263 in all the three assemblies. NA12878 was lower because of the low percentage of diploid regions  
264 in assembly  $R_6$  (**Table 1**). The overlaps were significantly greater than expected by chance  
265 (NA12878: 33.3%, p-value=0.0049; NA24385: 45.4%, p-value=0.0029. Chi square test). These  
266 observations were consistent with heterozygous variants being enriched in certain genomic  
267 segments, in which two haplotypes were more easily differentiated by Supernova2. Phase block  
268 lengths were mainly determined by total coverage  $C$  and increased in real data with increasing  
269 fragment length (**Figure S14**).

270

## 271 **Discussion**

272 In this study, we investigated human diploid assembly using 10x Linked-Read sequencing data  
273 on both simulated and real libraries. We developed the simulator LRTK-SIM to examine the likely  
274 impact of parameters in diploid assembly and compared results from simulated reads to those  
275 from real libraries. We thus determined the impact of key parameters ( $C_R$ ,  $C_F$ ,  $N_{FP}$  and  $\mu_{FL}/N\mu_{FL}$ )  
276 with respect to assembly continuity and accuracy. Our study provides a general strategy to  
277 evaluate assemblies of 10x data and may have implications for the evaluation of other barcode-  
278 based sequencing technologies such as CPTv2-seq [26] or stLRF [27] in the future when they  
279 become commercially available.

280

## 281 **10x Practicalities**

282 For standard Illumina sequencing, library complexity is usually sufficient to generate tremendous  
283 numbers of reads from unique templates and read coverage can be increased simply by  
284 sequencing more. However, the 10x Chromium system performs amplification in each partition,

285 and generally only about 20% to 40% of the original long fragment sequence can be captured as  
286 short fragments and eventually as reads, resulting in shallow sequencing coverage per fragment.  
287 Sequencing more deeply does not increase the per-fragment coverage much as most of the extra  
288 reads are from PCR duplicates. The solution is to sequence multiple 10x libraries constructed  
289 from the same DNA prep and merge them for analysis. This means that  $C_R$  remains in the  
290 standard range where PCR duplicates are relatively rare, but  $C_F$  increases proportionally to the  
291 number of libraries used. A practical limitation to this approach is that Supernova2 limits the  
292 number of barcodes to 4.8 million.

293

294 Our results showed that in practice,  $C_F$  should be between 335X and 823X, but no larger than  
295 1000X, given the optimal coverage of  $C=56X$  recommended by 10x and the requirement for  
296 sufficient per-fragment read coverage. Surprisingly, we observed that including more extremely  
297 long fragments was detrimental for assembly quality. This is possibly due to the loss of barcode  
298 specificity for fragments spanning repetitive sequences. From a computational perspective, too  
299 many long fragments are harmful to deconvolving the *de bruijn* graph, as more complex paths  
300 need to be picked out. In our experiments,  $W_{\mu_{FL}}$  between 50kb and 150kb is the best choice to  
301 generate reliable assemblies.

302

### 303 **Parameters driving assembly quality**

304 Our results regarding assembly quality, and the 10x parameters that influence it, may be useful  
305 for efforts in which *de novo* assemblies are important for generation of an initial reference  
306 sequence. We show that maximization of N50 does not necessarily reflect assembly quality,  
307 which we were able to compare to NA50 because there exists a high-quality human reference  
308 genome. Contig and scaffold lengths mostly increased with ascending sequencing coverage, and  
309 at sufficient overall sequence coverage it did not matter much whether the increasing coverage  
310  $C$  was accomplished by increasing  $C_R$  or  $C_F$ . However, both contig and scaffold accuracy

311 decreased with increasing  $C$ . We also found, counterintuitively, that contig and scaffold length  
312 mostly decreased with increasing fragment length, a phenomenon that may be due to the specific  
313 implementation; however, until there is another assembler that can be compared to Supernova2  
314 it will not be possible to reason about this effect. In addition, intrinsic properties of the genome  
315 matter greatly, as removal of repeats or lack of variation dramatically improves assembly quality.

316

317 Diploid assembly is the appropriate approach for assembly of genomes of diploid organisms that  
318 harbor variation. Therefore, an important metric to evaluate diploid assembly is the fraction of the  
319 genome that is assembled in a diploid state. The short input fragment length of  $R_6$  resulted in  
320 roughly 20% less of the genome in a diploid state (<60% vs <80%) compared to the other libraries  
321 of the same individual. This observation suggests that in addition to metrics such as N50,  
322 evaluation of assembly quality should also include the fraction of the genome (or the assembly)  
323 that is in a diploid state.

324

### 325 **Cost-benefit analysis**

326 Overall, we have attempted to give practical guidelines to assembly of 10x data with Supernova2  
327 and evaluate the performance across a wide range of metrics. Arguably, the metric that matters  
328 most in the context of a personal genome is the discovery of variation that lower-cost approaches  
329 do not enable. We estimate that the cost increase over standard Illumina sequencing is about 2x,  
330 given the 10X prep cost and the higher level of sequence coverage required. There may be many  
331 applications for which this combination of excellent single nucleotide variant detection (via  
332 barcode-aware read mapping) and precise structural variant discovery (via assembly), achieved  
333 by the same data set, is worth the price.

334

### 335 **Comparison with hybrid assemblies**



336 Hybrid assembly strategies have been applied successfully to produce human genome assembly  
337 of long contiguity [13, 28, 29]. In these studies, long contigs are first produced by single-molecule  
338 long-reads, such as PacBio (NG50=1.1Mb; [28]) or Nanopore (NG50=3.21Mb; [13]) comparing  
339 favorably to our best results for Linked-Reads assemblies (NG50=236kb). Scaffolding is then  
340 performed with complementary technologies such as BioNano to capture chromosomal level long-  
341 range information. It promoted the scaffold N50 of PacBio to 31.1Mb [28] and Illumina mate-pair  
342 sequencing with 10x data to 33.5Mb [22]. Using SuperNova2, the scaffold N50 from our studies  
343 reached ~27.86Mb ( $R_6$ ) on the basis of 10x data alone, suggesting that 10x technology gives  
344 broadly comparable results at a fraction of the price of long-read-based hybrid assemblies.

## 345 **Availability of supporting data**

346 The raw sequencing data are deposited in the Sequence Read Archive and the corresponding  
347 BioProject accession number is PRJNA527321. Diploid assemblies and the codes for comparison  
348 are currently available at [http://mendel.stanford.edu/supplementarydata/zhang\\_SN2\\_2019](http://mendel.stanford.edu/supplementarydata/zhang_SN2_2019) and  
349 [https://github.com/zhanglu295/Evaluate\\_diploid\\_assembly](https://github.com/zhanglu295/Evaluate_diploid_assembly). LRTK-SIM is publicly available at  
350 <https://github.com/zhanglu295/LRTK-SIM>.

351

## 352 **Additional files**

353 **Table S1.** Parameters of libraries prepared for NA12878 and NA24385.

354 **Table S2.** Parameters used to generate linked-reads sets for evaluating the impact of  $C_F$  and  $C_R$   
355 on assemblies.

356 **Table S3.** Parameters used to generate linked-reads sets for evaluating the impact of  $\mu_{FL}$  and  
357  $N_{FP}$  on assemblies.

358 **Table S4.** Genomic coverage and fraction of contigs in diploid state generated by Supernova2  
359 for the seven libraries prepared by 10x Genomics. Non-PAR: non-pseudoautosomal regions of  
360 X chromosome. WFU, YOR, YORM, PR are female; HGP, ASH and CHI are male.

361 **Figure S1. Basic statistics for  $L_{1L}$ .** The distributions of **A.** the number of fragments per partition;  
362 **B.** sequencing depth per fragment; **C.** probability density function of unweighted fragment lengths;  
363 **D.** cumulative density function of unweighted fragment lengths; **E.** reversed cumulative density  
364 function of unweighted fragment lengths; **F.** reversed cumulative density function of weighted  
365 fragment lengths.

366 **Figure S2. Basic statistics for  $L_{1M}$ .** The distributions of **A.** number of fragments per partition; **B.**  
367 sequencing depth per fragment; **C.** probability density function of unweighted fragment lengths;  
368 **D.** cumulative density function of unweighted fragment lengths; **E.** reversed cumulative density  
369 function of unweighted fragment lengths; **F.** reversed cumulative density function of weighted  
370 fragment lengths.

371 **Figure S3. Basic statistics for  $L_{1H}$ .** The distributions of **A.** number of fragments per partition; **B.**  
372 sequencing depth per fragment; **C.** probability density function of unweighted fragment lengths;  
373 **D.** cumulative density function of unweighted fragment lengths; **E.** reversed cumulative density  
374 function of unweighted fragment lengths; **F.** reversed cumulative density function of weighted  
375 fragment lengths.

376 **Figure S4. Basic statistics for  $L_2$ .** The distributions of **A.** number of fragments per partition; **B.**  
377 sequencing depth per fragment; **C.** probability density function of unweighted fragment lengths;  
378 **D.** cumulative density function of unweighted fragment lengths; **E.** reversed cumulative density  
379 function of unweighted fragment lengths; **F.** reversed cumulative density function of weighted  
380 fragment lengths.

381 **Figure S5. Basic statistics for  $L_3$ .** The distributions of **A.** number of fragments per partition; **B.**  
382 sequencing depth per fragment; **C.** probability density function of unweighted fragment lengths;  
383 **D.** cumulative density function of unweighted fragment lengths; **E.** reversed cumulative density  
384 function of unweighted fragment lengths; **F.** reversed cumulative density function of weighted  
385 fragment lengths.

386 **Figure S6. Basic statistics for  $L_4$ .** The distributions of **A.** number of fragments per partition; **B.**  
387 sequencing depth per fragment; **C.** probability density function of unweighted fragment lengths;  
388 **D.** cumulative density function of unweighted fragment lengths; **E.** reversed cumulative density  
389 function of unweighted fragment lengths; **F.** reversed cumulative density function of weighted  
390 fragment lengths.

391 **Figure S7. Basic statistics for  $L_5$ .** The distributions of **A.** number of fragments per partition; **B.**  
392 sequencing depth per fragment; **C.** probability density function of unweighted fragment lengths;  
393 **D.** cumulative density function of unweighted fragment lengths; **E.** reversed cumulative density  
394 function of unweighted fragment lengths; **F.** reversed cumulative density function of weighted  
395 fragment lengths.

396 **Figure S8. Basic statistics for  $L_6$ .** The distributions of **A.** number of fragments per partition; **B.**  
397 sequencing depth per fragment; **C.** probability density function of unweighted fragment lengths;  
398 **D.** cumulative density function of unweighted fragment lengths; **E.** reversed cumulative density  
399 function of unweighted fragment lengths; **F.** reversed cumulative density function of weighted  
400 fragment lengths.

401 **Figure S9.** The workflow of LR TK-SIM to simulate linked-reads

402 **Figure S10.** The effect of  $N_{FP}$  on human diploid assembly of chromosome 19 by Supernova2,  
403 where  $C$  ( $C=60X$ ;  $C_F=300X$  and  $C_R=0.2X$ ) and  $\mu_{FL}$  ( $\mu_{FL}=37\text{kb}$ ) are fixed.

404 **Figure S11.** Comparison of assembly qualities from 10x data with and without single nucleotide  
405 variants by changing  $C_F$ ,  $C_R$  and  $\mu_{FL}$ .  $C_R$  was fixed to 0.2X in **A** and **B**;  $C_F$  was fixed to 300X in  
406 **C** and **D**;  $C_R$  was fixed 0.2X and  $C_F$  was fixed 300X in **E** and **F**.

407 **Figure S12.** Comparison of assembly qualities from 10x data with (1% uniform) and without  
408 sequencing error by changing  $C_F$ ,  $C_R$  and  $\mu_{FL}$ .  $C_R$  was fixed to 0.2X in **A** and **B**;  $C_F$  was fixed to  
409 300X in **C** and **D**;  $C_R$  was fixed 0.2X and  $C_F$  was fixed 300X in **E** and **F**.

410 **Figure S13.** Overlaps of diploid regions for the three libraries from the same sample. Diploid  
411 regions for NA12878 (**A**) and NA24385 (**B**). The percentages denote the proportion of genome is  
412 diploid.

413 **Figure S14.** Phase block N50s as a function of different parameter combinations. **A.** simulated  
414 linked-reads with predefined parameters (**Table S4**) by changing  $C_F$  and  $C_R$ ; **B.** simulated linked-  
415 reads with matched parameters of real linked-read sets (**Table S2**) by changing  $C_F$  and  $C_R$ ; **C.**  
416 real linked-read sets (**Table S2**) by changing  $C_F$  and  $C_R$ ; **D.** simulated linked-read sets (**Table S3**)  
417 with different  $W_{\mu_{FL}}$ ; **E.** simulated linked-read sets with matched parameters (**Table S3**) with real  
418 linked-read sets as  $C=56X$ ; **F.** real linked-read sets with  $C=56X$  (**Table S3**).

419

## 420 **Competing interest**

421 Arend Sidow is a consultant and shareholder of DNAnexus, Inc.

## 422 **Author Contributions**

423 AS conceived the study. LZ and XZ wrote LRTK-SIM and performed the analyses. ZMW prepared  
424 the genomic DNA and 10x libraries. LZ, XZ, ZMW and AS analyzed the results and wrote the  
425 paper. All the authors read and approved the final manuscript.

## 426 **Acknowledgements**

427 This research was supported by training and research grants from the National Institute of  
428 Standards and Technology. We would like to thank Justin Zook, Marc Salit, Alex Bishara, Noah  
429 Spies, Nancy Hansen, David Jaffe, and Deanna Church for informative discussions.

430 **Table**

| Linked-<br>reads set | Overall<br>(%) | Diploid<br>regions<br>(%) | Haploid<br>regions<br>(%) | Non-PAR<br>(%) | Total contig<br>length<br>(contig>500bp) | Length of contigs<br>from megabubble<br>(contig>500bp) | Percentage<br>(%) |
|----------------------|----------------|---------------------------|---------------------------|----------------|------------------------------------------|--------------------------------------------------------|-------------------|
| $R_6$                | 91.9           | 58.9                      | 27.7                      | -              | 5,632,483,053                            | 3,758,345,846                                          | 66.73             |
| $R_7$                | 91.1           | 73.3                      | 11.3                      | -              | 5,613,140,437                            | 4,668,186,478                                          | 83.17             |
| $R_8$                | 91.7           | 77.2                      | 9.2                       | -              | 5,635,127,471                            | 4,896,821,850                                          | 86.90             |
| $R_9$                | 91.3           | 73.4                      | 12.2                      | 85.9           | 5,637,615,919                            | 4,438,175,621                                          | 78.72             |
| $R_{10}$             | 91.7           | 79.2                      | 5.8                       | 79.9           | 5,749,001,471                            | 4,793,226,150                                          | 83.37             |
| $R_{11}$             | 91.7           | 78.1                      | 7.9                       | 87.6           | 5,677,566,094                            | 4,723,083,367                                          | 83.19             |

431

432 **Table 1.** Genomic coverage of contigs generated by Supernova2. Non-PAR: non-  
 433 pseudoautosomal regions of X chromosome.  $R_6$ ,  $R_7$  and  $R_8$  are female;  $R_9$ ,  $R_{10}$  and  $R_{11}$  are male.

434

435 **Figures**

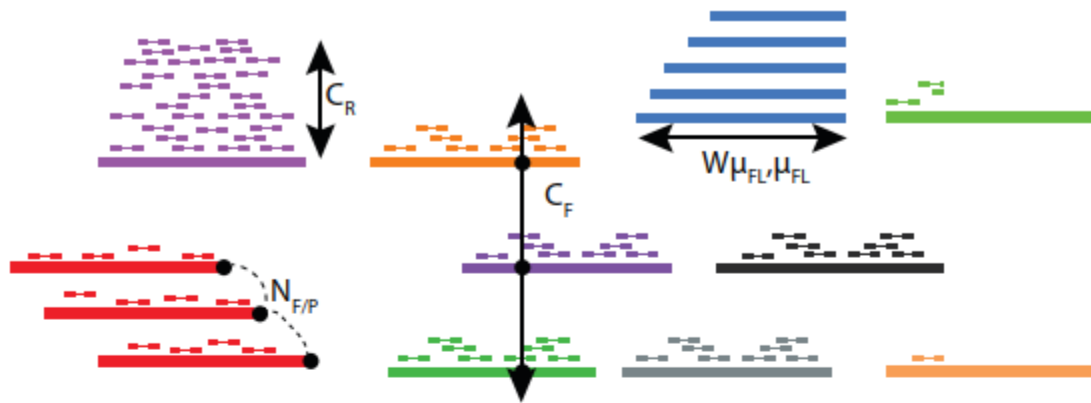

**Parameter**

$N_{F/P}$  = Number of fragments per partition  
 $\mu_{FL}$  = Mean fragment length  
 $W\mu_{FL}$  = Weighted mean fragment length  
 $C_R$  = Read coverage per fragment  
 $C_F$  = Physical (fragment) coverage  
 $C$  = total coverage

**Typical values**

10 - 100  
 $\mu_{FL}$  = 10-100kb  
 $W\mu_{FL}$  = 20-400kb  
 $C_R$  = 0.1x - 0.4x  
 $C_F$  = 200x - 1000x  
 $C = C_R * C_F = 40x - 80x$

| Linked-read set<br>R (Real) / S (Simulated) | Sequenced<br>Library | $\mu_{FL}$<br>(kb) | $W\mu_{FL}$<br>(kb) | $C_F$<br>(X) | $C_R$<br>(X) | $C$<br>(X) |
|---------------------------------------------|----------------------|--------------------|---------------------|--------------|--------------|------------|
| $R_1 / S_1$                                 | $L_{1L}$             | 21.6               | 38.6/35.7           | 19           | 0.2          | 4          |
| $R_2 / S_2$                                 | $L_{1M}$             | 22.4               | 39.7/37.4           | 117          | 0.2          | 24         |
| $R_3 / S_3$                                 | $L_{1M}$             | 22.4               | 39.7/36.8           | 117          | 0.4          | 48         |
| $R_4 / S_4$                                 | $L_{1H}$             | 24.0               | 41.1/40.7           | 334          | 0.2          | 67         |
| $R_5 / S_5$                                 | $L_{1M}$             | 22.4               | 39.7/36.8           | 117          | 0.6          | 72         |
| $R_6 / S_6$                                 | $L_{1H}$             | 24.0               | 41.1/40.6           | 334          | 0.17         | 56         |
| $R_7 / S_7$                                 | $L_2$                | 79.0               | 304.3/131.8         | 123          | 0.45         | 56         |
| $R_8 / S_8$                                 | $L_3$                | 99.2               | 214.5/168.3         | 958          | 0.058        | 56         |
| $R_9 / S_9$                                 | $L_4$                | 92.1               | 216.9/154.1         | 1504         | 0.036        | 56         |
| $R_{10} / S_{10}$                           | $L_5$                | 120.8              | 267.4/203.7         | 208          | 0.27         | 56         |
| $R_{11} / S_{11}$                           | $L_6$                | 64.2               | 151.7/107.6         | 803          | 0.07         | 56         |

436 **Figure 1.** The Linked-Read sets prepared to evaluate the impact of  $C_F$ ,  $C_R$ ,  $\mu_{FL}$  and  $W\mu_{FL}$  on  
 437 human diploid assembly.

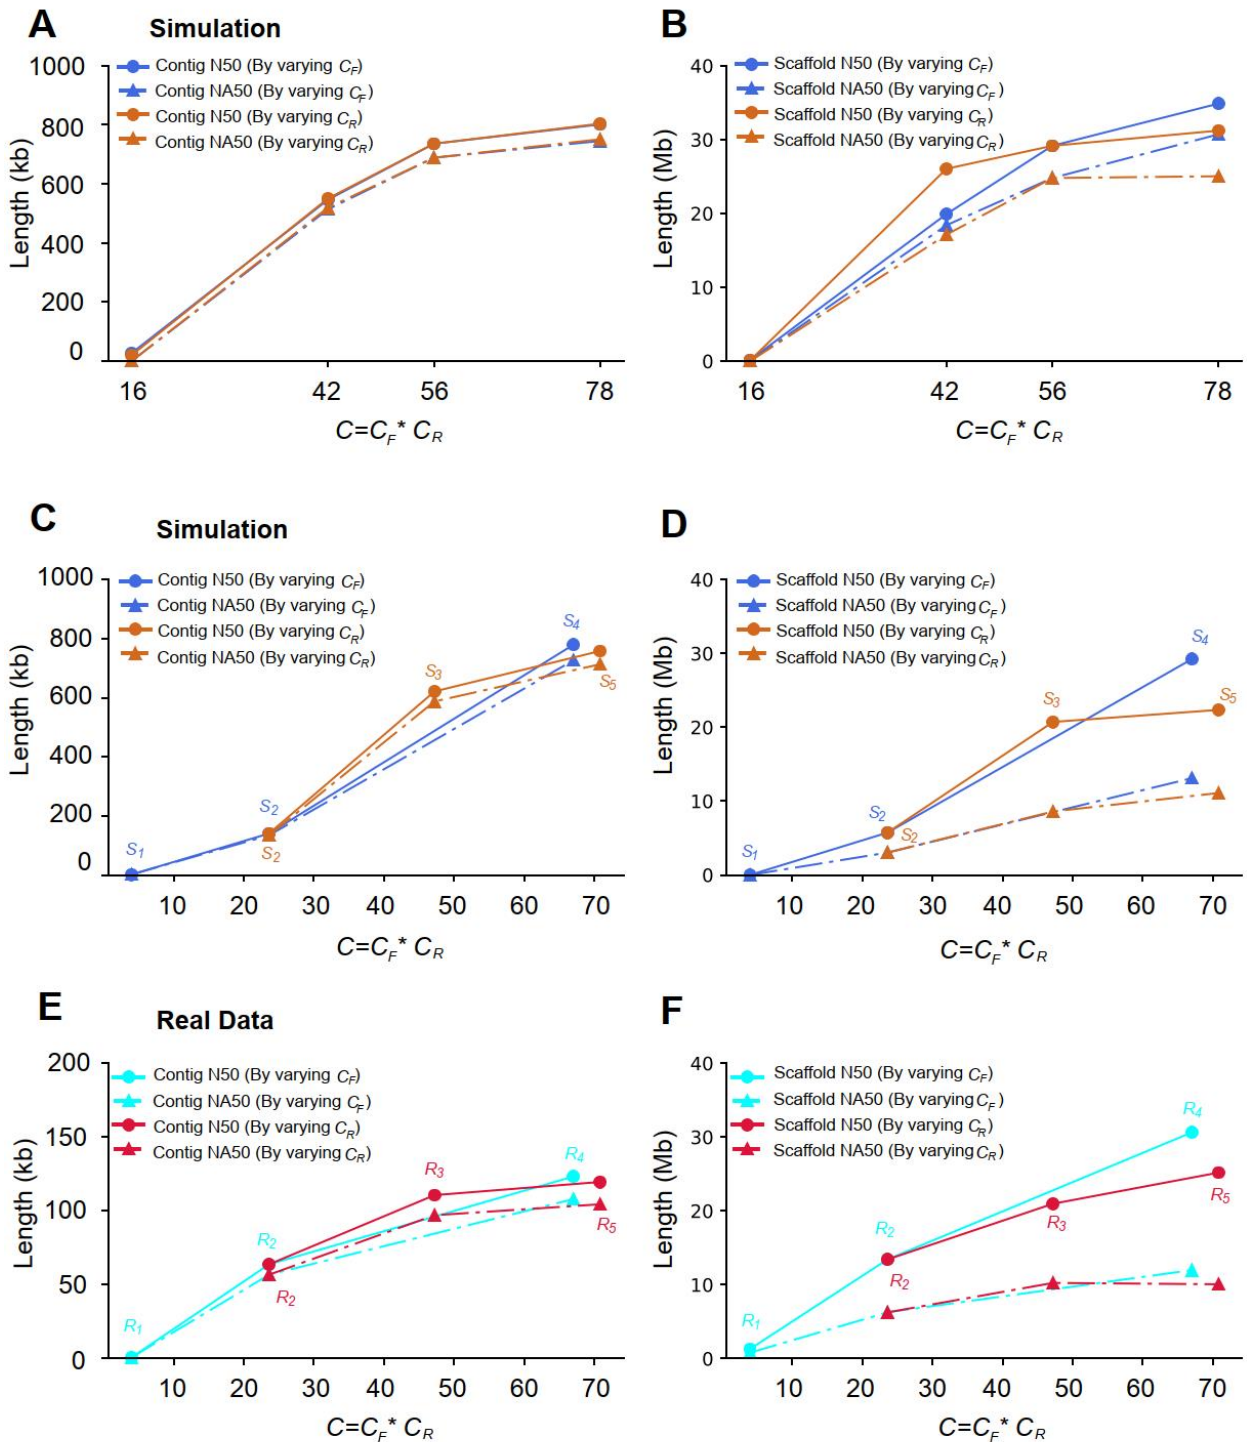

438

439 **Figure 2.** Contig and scaffold lengths (N50 and NA50) as a function of  $C_F$  or  $C_R$ . **A** and **B**:

440 Simulated Linked-Reads with predefined parameters (**Table S2**); **C** and **D**: Simulated Linked-

441 reads with matched parameters of real Linked-Read data sets (**Figure 1**); **E** and **F**: Real Linked-  
442 Read sets (**Figure 1**).



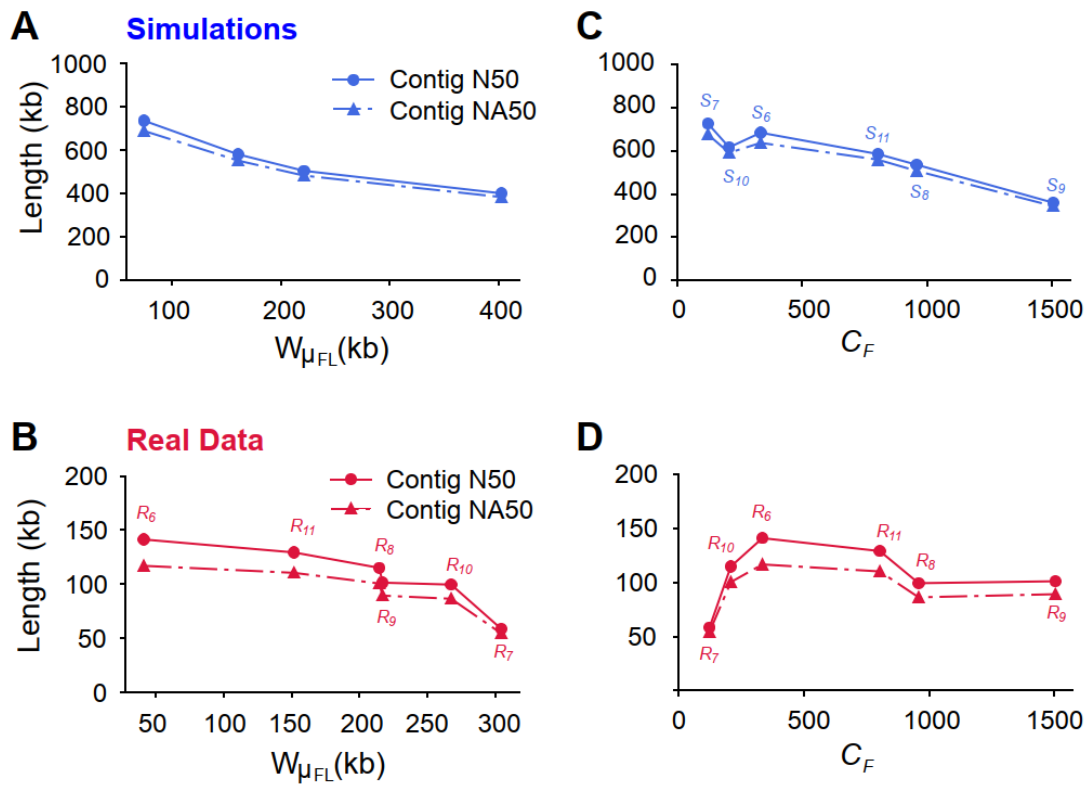

443

444 **Figure 3.** Contig qualities (N50 and NA50) as a function of fragment length  $W_{\mu_{FL}}$  or physical

445 coverage  $C_F$ , at  $C=56X$ . **A** and **C**, results from simulations; **B** and **D**, results from real data.

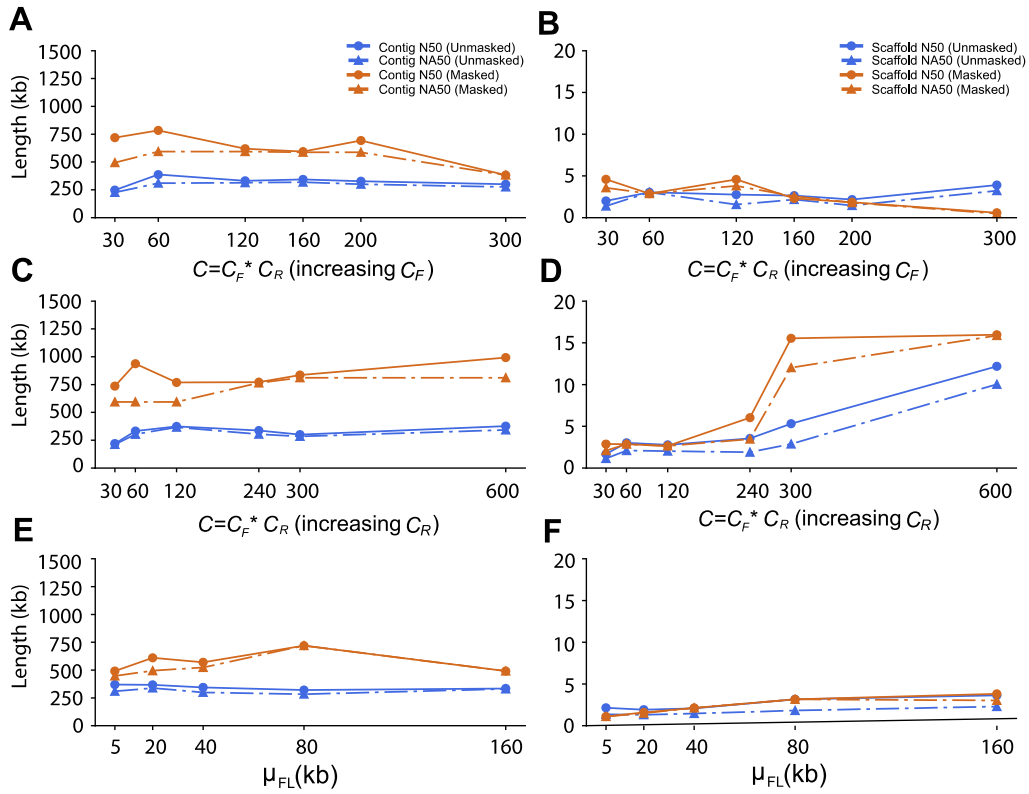

446

447 **Figure 4.** Comparison of contig and scaffold lengths from 10x data with masked and unmasked

448 repetitive sequences by changing  $C_F$ ,  $C_R$  and  $\mu_{FL}$ .  $C_R$  was fixed to 0.2X in **A** and **B**;  $C_F$  was fixed

449 to 300X in **C** and **D**;  $C_R$  was fixed to 0.2X and  $C_F$  was fixed to 300X in **E** and **F**.

450

451 **References**

- 452 1. Metzker ML. Sequencing technologies - the next generation. *Nat Rev Genet.* 2010;11 1:31-  
453 46. doi:10.1038/nrg2626.
- 454 2. Shendure J, Balasubramanian S, Church GM, Gilbert W, Rogers J, Schloss JA, et al. DNA  
455 sequencing at 40: past, present and future. *Nature.* 2017;550 7676:345-53.  
456 doi:10.1038/nature24286.
- 457 3. Head SR, Komori HK, LaMere SA, Whisenant T, Van Nieuwerburgh F, Salomon DR, et  
458 al. Library construction for next-generation sequencing: overviews and challenges.  
459 *Biotechniques.* 2014;56 2:61-4, 6, 8, passim. doi:10.2144/000114133.
- 460 4. O'Connell J, Sharp K, Shrine N, Wain L, Hall I, Tobin M, et al. Haplotype estimation for  
461 biobank-scale data sets. *Nat Genet.* 2016;48 7:817-20. doi:10.1038/ng.3583.
- 462 5. Delaneau O, Zagury JF and Marchini J. Improved whole-chromosome phasing for disease  
463 and population genetic studies. *Nat Methods.* 2013;10 1:5-6. doi:10.1038/nmeth.2307.
- 464 6. O'Connell J, Gurdasani D, Delaneau O, Pirastu N, Ulivi S, Cocca M, et al. A general  
465 approach for haplotype phasing across the full spectrum of relatedness. *PLoS Genet.*  
466 2014;10 4:e1004234. doi:10.1371/journal.pgen.1004234.
- 467 7. Roach JC, Glusman G, Hubley R, Montsaroff SZ, Holloway AK, Mauldin DE, et al.  
468 Chromosomal haplotypes by genetic phasing of human families. *Am J Hum Genet.*  
469 2011;89 3:382-97. doi:10.1016/j.ajhg.2011.07.023.
- 470 8. Kajitani R, Toshimoto K, Noguchi H, Toyoda A, Ogura Y, Okuno M, et al. Efficient de  
471 novo assembly of highly heterozygous genomes from whole-genome shotgun short reads.  
472 *Genome Res.* 2014;24 8:1384-95. doi:10.1101/gr.170720.113.

- 473 9. Alkan C, Sajjadian S and Eichler EE. Limitations of next-generation genome sequence  
474 assembly. *Nat Methods*. 2011;8 1:61-5. doi:10.1038/nmeth.1527.
- 475 10. Treangen TJ and Salzberg SL. Repetitive DNA and next-generation sequencing:  
476 computational challenges and solutions. *Nat Rev Genet*. 2011;13 1:36-46.  
477 doi:10.1038/nrg3117.
- 478 11. Huddleston J, Ranade S, Malig M, Antonacci F, Chaisson M, Hon L, et al. Reconstructing  
479 complex regions of genomes using long-read sequencing technology. *Genome Res*.  
480 2014;24 4:688-96. doi:10.1101/gr.168450.113.
- 481 12. Lu H, Giordano F and Ning Z. Oxford Nanopore MinION Sequencing and Genome  
482 Assembly. *Genomics Proteomics Bioinformatics*. 2016;14 5:265-79.  
483 doi:10.1016/j.gpb.2016.05.004.
- 484 13. Jain M, Koren S, Miga KH, Quick J, Rand AC, Sasani TA, et al. Nanopore sequencing and  
485 assembly of a human genome with ultra-long reads. *Nat Biotechnol*. 2018;36 4:338-45.  
486 doi:10.1038/nbt.4060.
- 487 14. Cao H, Wu H, Luo R, Huang S, Sun Y, Tong X, et al. De novo assembly of a haplotype-  
488 resolved human genome. *Nat Biotechnol*. 2015;33 6:617-22. doi:10.1038/nbt.3200.
- 489 15. Peters BA, Kermani BG, Sparks AB, Alferov O, Hong P, Alexeev A, et al. Accurate whole-  
490 genome sequencing and haplotyping from 10 to 20 human cells. *Nature*. 2012;487  
491 7406:190-5. doi:10.1038/nature11236.
- 492 16. Edge P, Bafna V and Bansal V. HapCUT2: robust and accurate haplotype assembly for  
493 diverse sequencing technologies. *Genome Res*. 2017;27 5:801-12.  
494 doi:10.1101/gr.213462.116.

- 495 17. Patterson M, Marschall T, Pisanti N, van Iersel L, Stougie L, Klau GW, et al. WhatsHap:  
496 Weighted Haplotype Assembly for Future-Generation Sequencing Reads. *J Comput Biol.*  
497 2015;22 6:498-509. doi:10.1089/cmb.2014.0157.
- 498 18. Zheng GX, Lau BT, Schnall-Levin M, Jarosz M, Bell JM, Hindson CM, et al. Haplotyping  
499 germline and cancer genomes with high-throughput linked-read sequencing. *Nat*  
500 *Biotechnol.* 2016;34 3:303-11. doi:10.1038/nbt.3432.
- 501 19. Spies N, Weng Z, Bishara A, McDaniel J, Catoe D, Zook JM, et al. Genome-wide  
502 reconstruction of complex structural variants using read clouds. *Nat Methods.* 2017;14  
503 9:915-20. doi:10.1038/nmeth.4366.
- 504 20. Bishara A, Moss EL, Kolmogorov M, Parada AE, Weng Z, Sidow A, et al. High-quality  
505 genome sequences of uncultured microbes by assembly of read clouds. *Nat Biotechnol.*  
506 2018; doi:10.1038/nbt.4266.
- 507 21. Weisenfeld NI, Kumar V, Shah P, Church DM and Jaffe DB. Direct determination of  
508 diploid genome sequences. *Genome Res.* 2017;27 5:757-67. doi:10.1101/gr.214874.116.
- 509 22. Mostovoy Y, Levy-Sakin M, Lam J, Lam ET, Hastie AR, Marks P, et al. A hybrid approach  
510 for de novo human genome sequence assembly and phasing. *Nat Methods.* 2016;13 7:587-  
511 90. doi:10.1038/nmeth.3865.
- 512 23. Hulse-Kemp AM, Maheshwari S, Stoffel K, Hill TA, Jaffe D, Williams SR, et al. Reference  
513 quality assembly of the 3.5-Gb genome of *Capsicum annuum* from a single linked-read  
514 library. *Hortic Res.* 2018;5:4. doi:10.1038/s41438-017-0011-0.
- 515 24. Elyanow R, Wu HT and Raphael BJ. Identifying structural variants using linked-read  
516 sequencing data. *Bioinformatics.* 2017; doi:10.1093/bioinformatics/btx712.

- 517 25. Jones SJ, Haulena M, Taylor GA, Chan S, Bilobram S, Warren RL, et al. The Genome of  
518 the Northern Sea Otter (*Enhydra lutris kenyoni*). *Genes* (Basel). 2017;8 12  
519 doi:10.3390/genes8120379.
- 520 26. Zhang F, Christiansen L, Thomas J, Pokholok D, Jackson R, Morrell N, et al. Haplotype  
521 phasing of whole human genomes using bead-based barcode partitioning in a single tube.  
522 *Nat Biotechnol*. 2017;35 9:852-7. doi:10.1038/nbt.3897.
- 523 27. Peters BA, Liu J and Drmanac R. Co-barcoded sequence reads from long DNA fragments:  
524 a cost-effective solution for "perfect genome" sequencing. *Front Genet*. 2014;5:466.  
525 doi:10.3389/fgene.2014.00466.
- 526 28. Pendleton M, Sebra R, Pang AW, Ummat A, Franzen O, Rausch T, et al. Assembly and  
527 diploid architecture of an individual human genome via single-molecule technologies. *Nat*  
528 *Methods*. 2015;12 8:780-6. doi:10.1038/nmeth.3454.
- 529 29. Ma ZS, Li L, Ye C, Peng M and Zhang YP. Hybrid assembly of ultra-long Nanopore reads  
530 augmented with 10x-Genomics contigs: Demonstrated with a human genome. *Genomics*.  
531 2018; doi:10.1016/j.ygeno.2018.12.013.
- 532 30. Li H. Minimap2: pairwise alignment for nucleotide sequences. *Bioinformatics*. 2018;34  
533 18:3094-100. doi:10.1093/bioinformatics/bty191.
- 534 31. Mikheenko A, Prjibelski A, Saveliev V, Antipov D and Gurevich A. Versatile genome  
535 assembly evaluation with QUAST-LG. *Bioinformatics*. 2018;34 13:i142-i50.  
536 doi:10.1093/bioinformatics/bty266.
- 537 32. Earl D, Bradnam K, St John J, Darling A, Lin D, Fass J, et al. Assemblathon 1: a  
538 competitive assessment of de novo short read assembly methods. *Genome Res*. 2011;21  
539 12:2224-41. doi:10.1101/gr.126599.111.

540

## 541 **Supplementary Notes**

542

### 543 **LRTK-SIM**

544 LRTK-SIM was designed to simulate linked-reads generated by the 10X Chromium instrument  
545 and Illumina sequencer, which consists of four key steps:

- 546 **1. Generate diploid reference genome of NA12878.** (See Methods in main manuscript.)
- 547 **2. Simulate long DNA fragments.** Assuming the DNA fragment physical coverage was  $C_F$ , the  
548 total volume of DNA was represented as  $V=C_F*L$ , where  $L$  represented the length of reference  
549 genome. Equal physical coverage was assumed for two haplotypes, i.e.  $\frac{C_F}{2}$ . The start point for  
550 each fragment was randomly picked across the reference and its unweighted length is  
551 generated from an exponential distribution with mean of  $\mu_{FL}$ .
- 552 **3. DNA fragment barcoding.** About 4.79 million 16-mer barcode sequences were available in  
553 the Long Ranger whitelist. LRTK-SIM generated 'pseudo' partitions with unique barcodes and  
554 allocated long DNA fragments to them. The number of fragments per partition was sampled  
555 from a Poisson distribution with mean of  $N_{F/P}$ .
- 556 **4. Simulate Illumina short reads.** LRTK-SIM assumed short reads cover the long DNA  
557 fragments uniformly. The number of reads to be generated were calculated as  $\frac{C_R \times V}{R_L}$ , where  $R_L$   
558 is the length for short reads (150bp by default). The insert size for paired-end reads follows a  
559 normal distribution with mean of 400bp. The empirical base quality was learned from linked-  
560 reads that were sequenced by Illumina HiSeq X and the positions of sequencing errors were  
561 selected randomly.

562

563 LRTK-SIM has two advantages: 1. LRTK-SIM is an all-in-one package and implemented in python;  
564 it does not rely on any external packages or programs. 2. It explicitly imitates the generation of  
565 linked-reads and includes four key parameters:  $C_F$ ,  $C_R$ ,  $\mu_{FL}$  and  $N_{F/P}$  to fine-tune modeling of the  
566 experimental workflow. LRTK-SIM is speeded up by multithreading and publicly available at  
567 <https://github.com/LRTK/LRTK-SIM>.

568

### 569 **Evaluation of diploid assembly**

570 The performance of assembly was evaluated by QUAST-LG and our in-house programs. The  
571 scaffolds were broken into contigs when encountering at least 10 consecutive 'N's. Minimap2 was  
572 applied to align contigs against reference genome and QUAST-LG was used to post-process the

573 alignments. Contigs shorter than 500bp and scaffolds shorter than 1kb were removed from  
574 evaluation. Contig-aligned blocks were generated by breaking contigs at misassemblies,  
575 including relocation, inversion and translocation (according to QUASt-LG).

576

577 Similar to contigs, for calculating scaffold NA50 scaffold-aligned blocks were obtained by breaking  
578 scaffolds at contig misjoins. For example, if there are three contigs ordered as  $\{a, b, c\}$  in the  
579 scaffold, misjoins were classified into four types: 1) Relocation, if the alignment-based order of  
580 the contigs was different but on the same chromosome; for example if the contigs were aligned  
581 in the order  $\{a, c, b\}$  to the hg38 assembly. 2) Inversion, if two connected contigs were in the same  
582 order but one of them had reversed orientation in the alignment. 3) Translocation, if two  
583 sequences from different chromosomes were merged into adjacent contigs. 4) Indel, if an internal  
584 contig such as  $b$  was unaligned or removed due to insufficient contig length ( $<500\text{bp}$ ). Indels were  
585 not considered misjoins if  $b$  was shorter than 200bp or the gap between  $a$  and  $c$  was within 1000bp  
586 of  $b$ 's length.



587 **Supplementary Tables**

588

| Raw DNA Preparation      | Sequenced Library      | Sample id | Raw coverage (X) | $\mu_{FL}/W\mu_{FL}$ (kb) | PCR duplication (%) | $C_F$ (X) | $C_R$ (X) |
|--------------------------|------------------------|-----------|------------------|---------------------------|---------------------|-----------|-----------|
| <i>Prep</i> <sub>1</sub> | <i>L</i> <sub>1L</sub> | NA12878   | 94               | 21.6/38.7                 | 53.08               | 19.3      | 0.83      |
| <i>Prep</i> <sub>1</sub> | <i>L</i> <sub>1M</sub> | NA12878   | 175              | 22.4/39.7                 | 29.24               | 117.6     | 0.54      |
| <i>Prep</i> <sub>1</sub> | <i>L</i> <sub>1H</sub> | NA12878   | 192              | 24.0/41.1                 | 10.92               | 334       | 0.27      |
| <i>Prep</i> <sub>2</sub> | <i>L</i> <sub>2</sub>  | NA12878   | 103              | 79.0/304.3                | 19.97               | 123.2     | 0.41      |
| <i>Prep</i> <sub>3</sub> | <i>L</i> <sub>3</sub>  | NA12878   | 106              | 99.2/214.5                | 11.09               | 958.7     | 0.07      |
| <i>Prep</i> <sub>4</sub> | <i>L</i> <sub>4</sub>  | NA24385   | 117              | 92.1/216.9                | 10.88               | 1504.6    | 0.05      |
| <i>Prep</i> <sub>5</sub> | <i>L</i> <sub>5</sub>  | NA24385   | 100              | 120.8/267.4               | 18.51               | 208.4     | 0.25      |
| <i>Prep</i> <sub>6</sub> | <i>L</i> <sub>6</sub>  | NA24385   | 100              | 64.2/151.7                | 12.39               | 803.3     | 0.08      |

589

590

**Table S1.** Parameters of libraries prepared for NA12878 and NA24385.

| Parameters | Linked-Read set | $\mu_{FL}/W\mu_{FL}$<br>(kb) | $N_{FP}$ | $C_F$<br>(X) | $C_R$<br>(X) | $C$<br>(X) |
|------------|-----------------|------------------------------|----------|--------------|--------------|------------|
| $C_F$      | $C_{F1}$        | 37/75                        | 10       | 156          | 0.10         | 16         |
|            | $C_{F2}$        | 37/75                        | 10       | 156          | 0.27         | 42         |
|            | $C_{F3}$        | 37/75                        | 10       | 156          | 0.36         | 56         |
|            | $C_{F4}$        | 37/75                        | 10       | 156          | 0.5          | 78         |
| $C_R$      | $C_{R1}$        | 37/75                        | 10       | 44           | 0.36         | 16         |
|            | $C_{R2}$        | 37/75                        | 10       | 117          | 0.36         | 42         |
|            | $C_{R3}$        | 37/75                        | 10       | 156          | 0.36         | 56         |
|            | $C_{R4}$        | 37/75                        | 10       | 217          | 0.26         | 78         |

591

592 **Table S2.** Parameters used to generate Linked-Read sets for evaluating the impact of  $C_F$  and

593  $C_R$  on assemblies.

| Parameters | Linked-Read set        | $\mu_{FL}/W\mu_{FL}$<br>(kb) | $N_{FP}$ | $C_F$<br>(X) | $C_R$<br>(X) | $C$<br>(X) |
|------------|------------------------|------------------------------|----------|--------------|--------------|------------|
| $\mu_{FL}$ | $\mu_{FL1}/W\mu_{FL1}$ | 37/75                        | 10       | 156          | 0.36         | 56         |
|            | $\mu_{FL2}/W\mu_{FL2}$ | 80/161                       | 10       | 156          | 0.36         | 56         |
|            | $\mu_{FL3}/W\mu_{FL3}$ | 110/221                      | 10       | 156          | 0.36         | 56         |
|            | $\mu_{FL4}/W\mu_{FL4}$ | 200/402                      | 10       | 156          | 0.36         | 56         |
| $N_{FP}$   | $N_{FP1}$              | 37/75                        | 1        | 156          | 0.36         | 56         |
|            | $N_{FP2}$              | 37/75                        | 2        | 156          | 0.36         | 56         |
|            | $N_{FP3}$              | 37/75                        | 4        | 156          | 0.36         | 56         |
|            | $N_{FP4}$              | 37/75                        | 8        | 156          | 0.36         | 56         |
|            | $N_{FP5}$              | 37/75                        | 16       | 156          | 0.36         | 56         |

594

595 **Table S3.** Parameters used to generate Linked-Read sets for evaluating the impact of  $\mu_{FL}$  and  
596  $N_{FP}$  on assemblies.

| Library | Overall (%) | Diploid regions (%) | Haploid regions (%) | Non-PAR (%) |
|---------|-------------|---------------------|---------------------|-------------|
| HGP     | 91.9%       | 79.7%               | 4.59%               | 88.8%       |
| ASH     | 91.8%       | 79.5%               | 5.26%               | 88.0%       |
| WFU     | 91.9%       | 76.5%               | 8.59%               | -           |
| CHI     | 91.8%       | 78.3%               | 7.50%               | 87.7%       |
| YOR     | 91.8%       | 80.1%               | 2.27%               | -           |
| YORM    | 91.9%       | 76.7%               | 2.68%               | -           |
| PR      | 91.9%       | 77.2%               | 7.89%               | -           |

597

598 **Table S4.** Genomic coverage and fraction of contigs in diploid state generated by Supernova2  
599 for the seven libraries prepared by 10x Genomics. Non-PAR: non-pseudoautosomal regions of  
600 X chromosome. WFU, YOR, YORM, PR are female; HGP, ASH and CHI are male.

601 **Supplementary Figures**

602

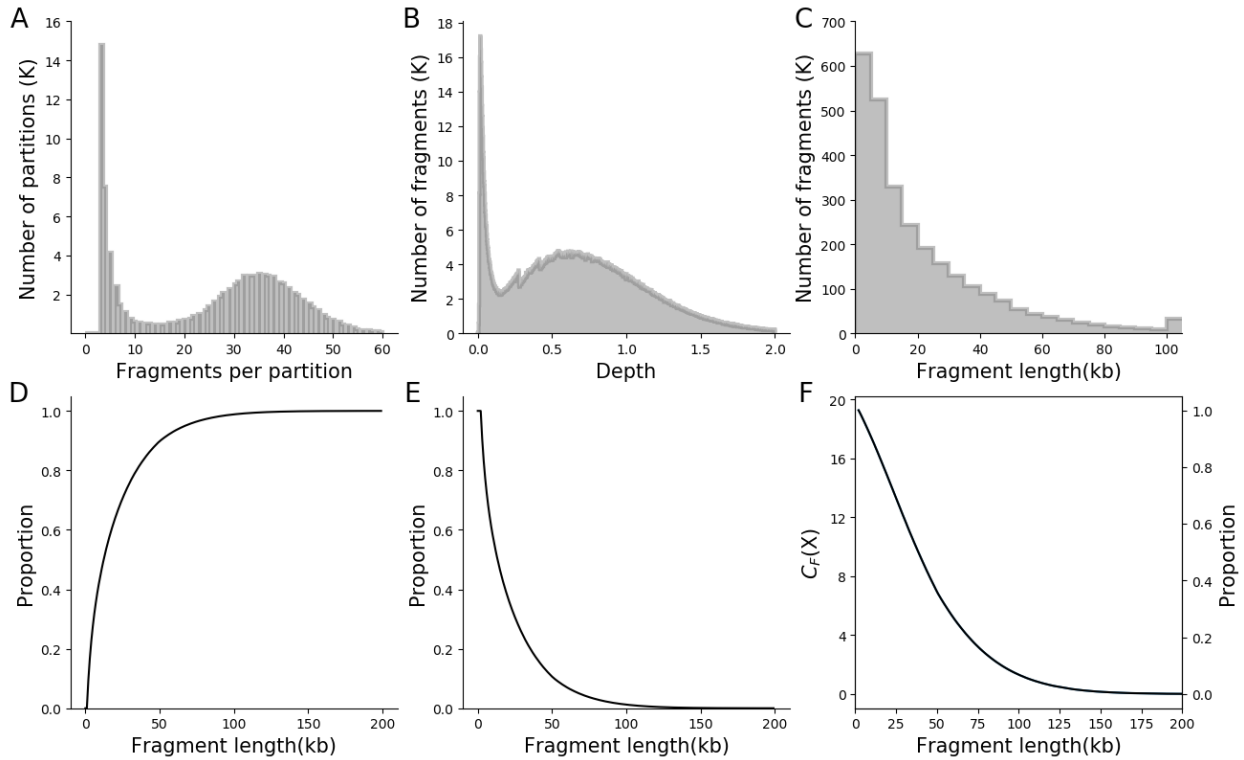

603  
604

605 **Figure S1. Basic statistics for  $L_{1L}$ .** The distributions of **A.** the number of fragments per partition;  
606 **B.** sequencing depth per fragment; **C.** probability density function of unweighted fragment lengths;  
607 **D.** cumulative density function of unweighted fragment lengths; **E.** reversed cumulative density  
608 function of unweighted fragment lengths; **F.** reversed cumulative density function of weighted  
609 fragment lengths.

610

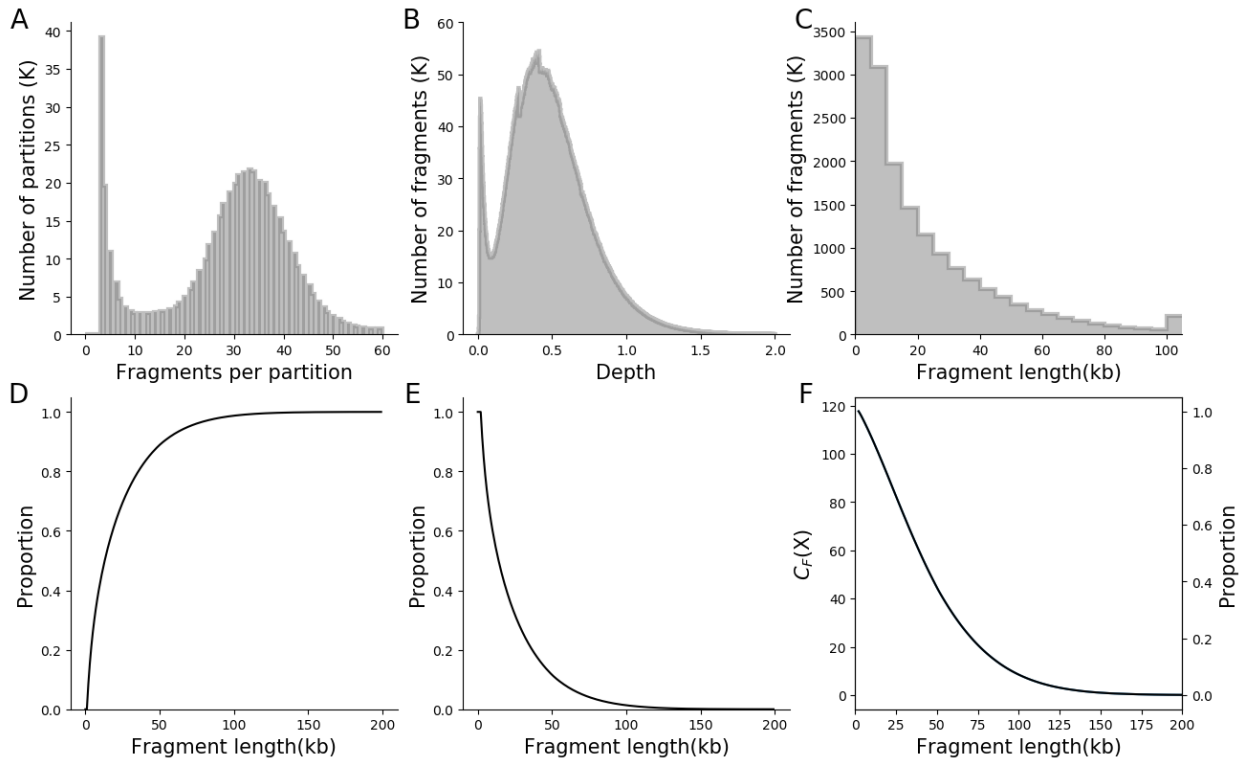

611  
612

613 **Figure S2. Basic statistics for  $L_{1M}$ .** The distributions of **A.** number of fragments per partition; **B.**  
614 sequencing depth per fragment; **C.** probability density function of unweighted fragment lengths;  
615 **D.** cumulative density function of unweighted fragment lengths; **E.** reversed cumulative density  
616 function of unweighted fragment lengths; **F.** reversed cumulative density function of weighted  
617 fragment lengths.

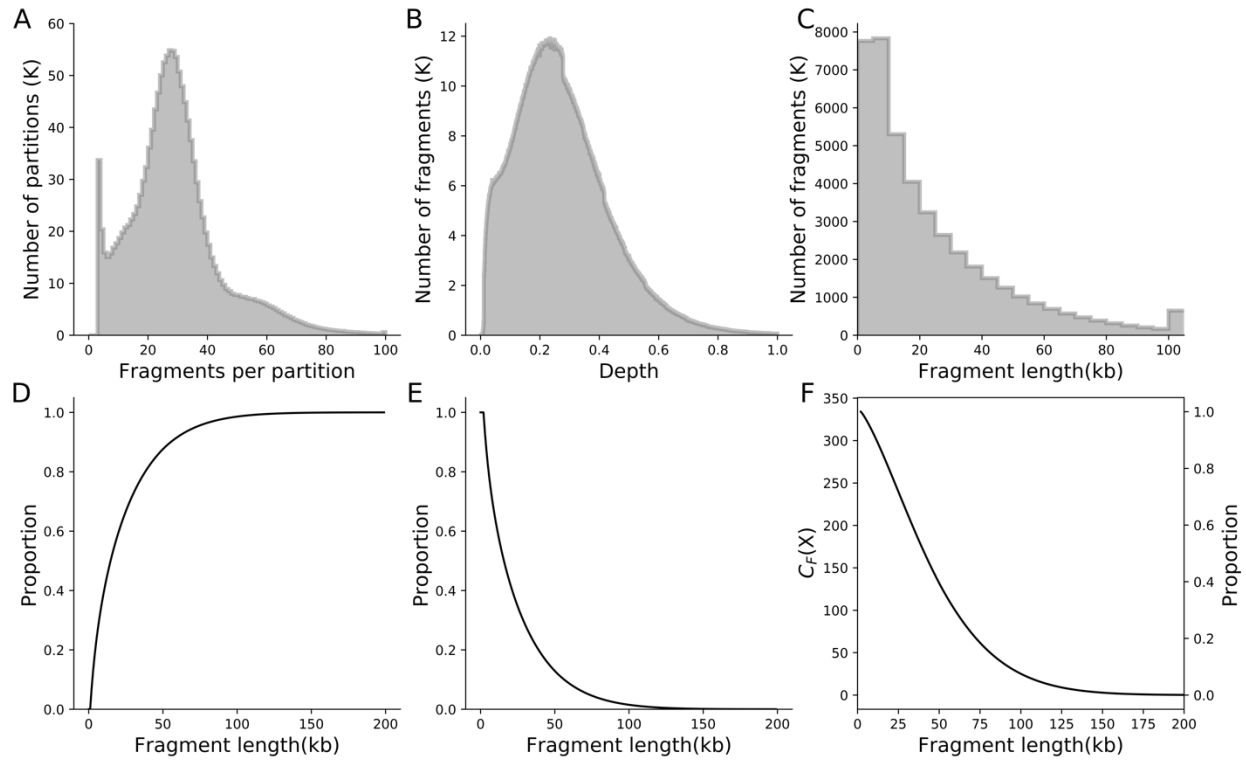

618  
619

620 **Figure S3. Basic statistics for  $L_{1H}$ .** The distributions of **A.** number of fragments per partition; **B.**  
 621 sequencing depth per fragment; **C.** probability density function of unweighted fragment lengths;  
 622 **D.** cumulative density function of unweighted fragment lengths; **E.** reversed cumulative density  
 623 function of unweighted fragment lengths; **F.** reversed cumulative density function of weighted  
 624 fragment lengths.

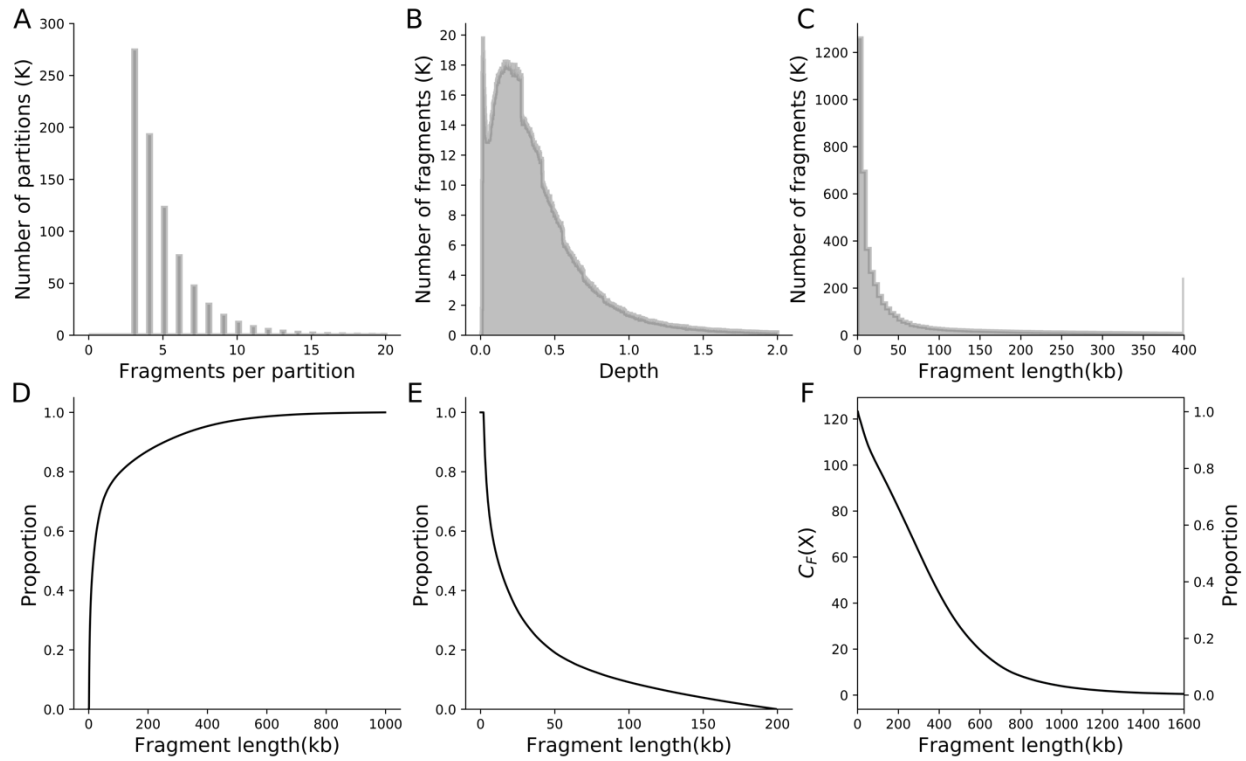

625  
626

627 **Figure S4. Basic statistics for  $L_2$ .** The distributions of **A.** number of fragments per partition; **B.**  
 628 sequencing depth per fragment; **C.** probability density function of unweighted fragment lengths;  
 629 **D.** cumulative density function of unweighted fragment lengths; **E.** reversed cumulative density  
 630 function of unweighted fragment lengths; **F.** reversed cumulative density function of weighted  
 631 fragment lengths.

632



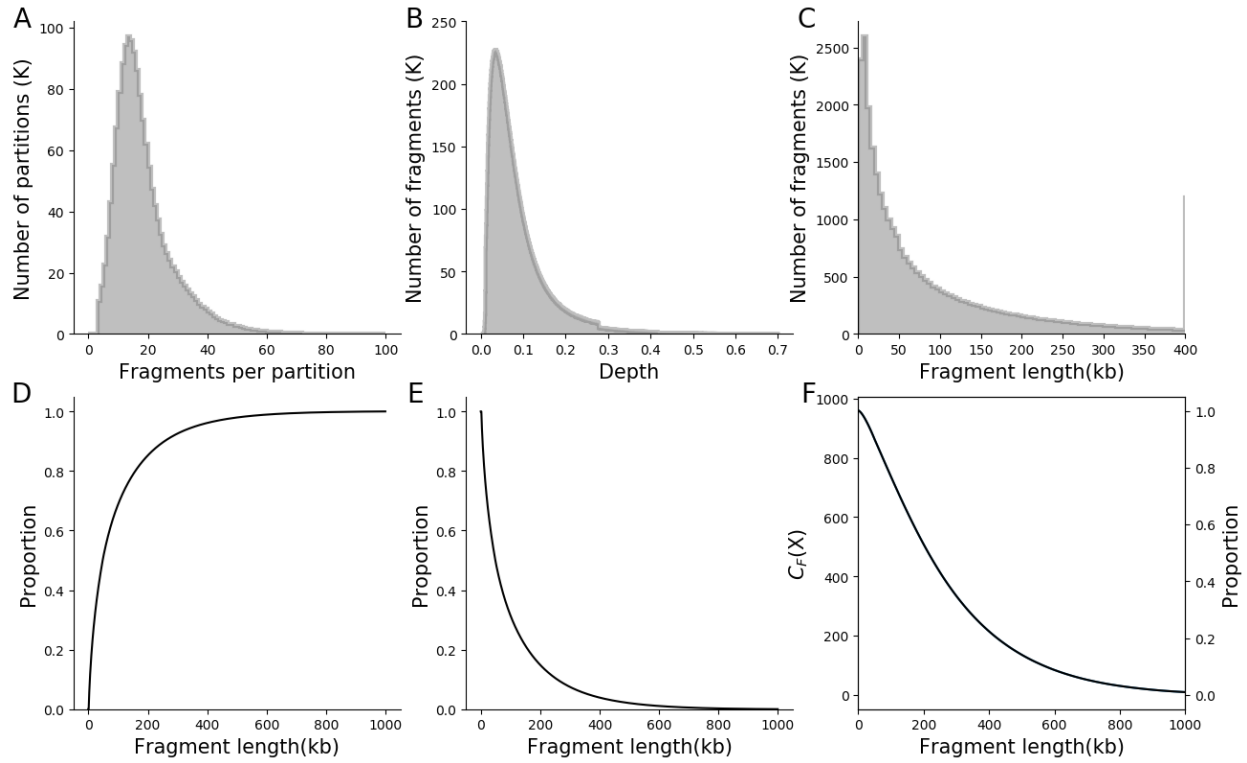

633  
634

635 **Figure S5. Basic statistics for  $L_3$ .** The distributions of **A.** number of fragments per partition; **B.**  
 636 sequencing depth per fragment; **C.** probability density function of unweighted fragment lengths;  
 637 **D.** cumulative density function of unweighted fragment lengths; **E.** reversed cumulative density  
 638 function of unweighted fragment lengths; **F.** reversed cumulative density function of weighted  
 639 fragment lengths.

640

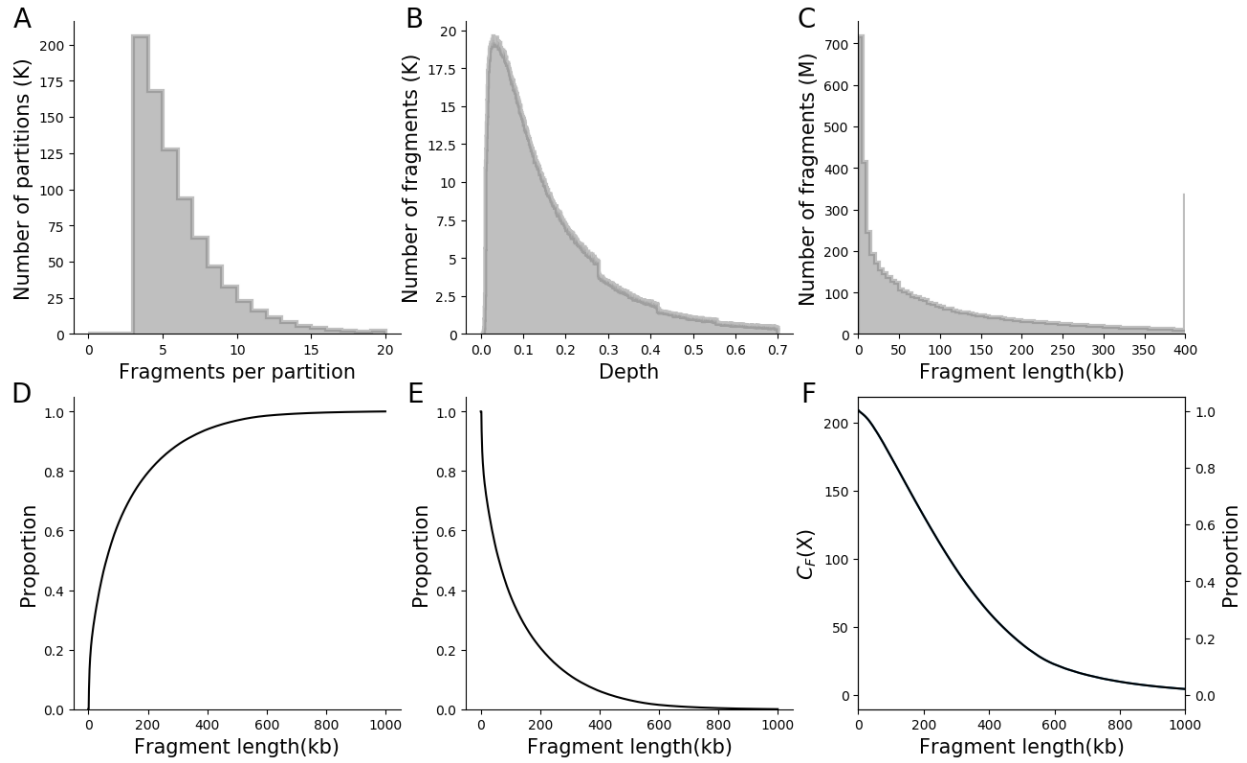

641  
642

643 **Figure S6. Basic statistics for  $L_4$ .** The distributions of **A.** number of fragments per partition; **B.**  
 644 sequencing depth per fragment; **C.** probability density function of unweighted fragment lengths;  
 645 **D.** cumulative density function of unweighted fragment lengths; **E.** reversed cumulative density  
 646 function of unweighted fragment lengths; **F.** reversed cumulative density function of weighted  
 647 fragment lengths.

648

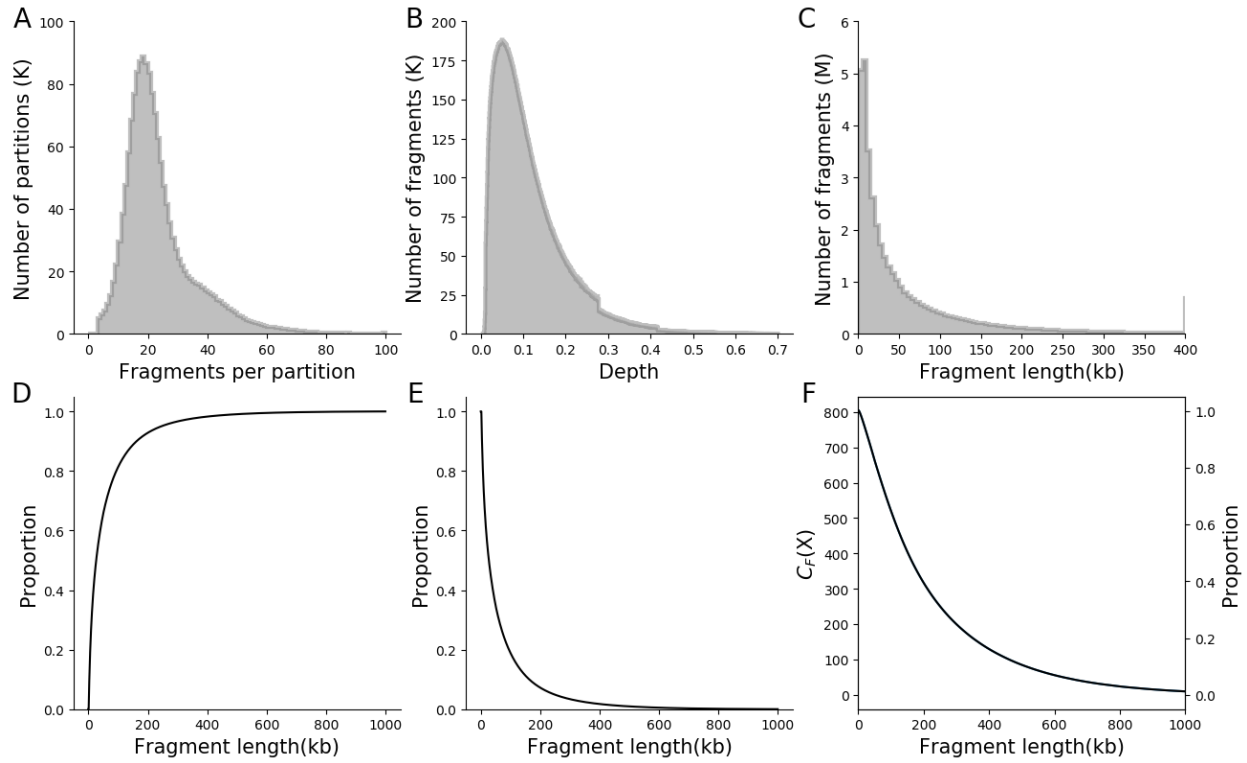

649  
650

651 **Figure S7. Basic statistics for  $L_5$ .** The distributions of **A.** number of fragments per partition; **B.**  
 652 sequencing depth per fragment; **C.** probability density function of unweighted fragment lengths;  
 653 **D.** cumulative density function of unweighted fragment lengths; **E.** reversed cumulative density  
 654 function of unweighted fragment lengths; **F.** reversed cumulative density function of weighted  
 655 fragment lengths.

656

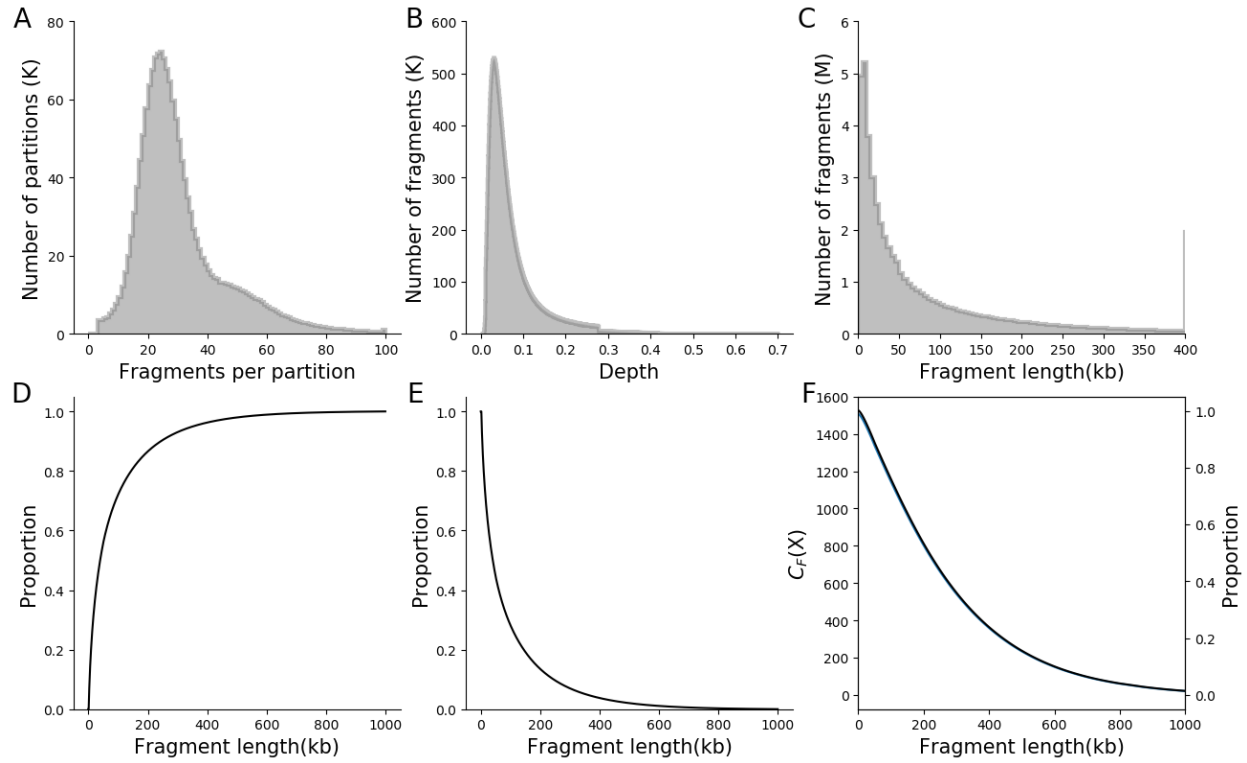

657  
658

659 **Figure S8. Basic statistics for  $L_6$ .** The distributions of **A.** number of fragments per partition; **B.**  
 660 sequencing depth per fragment; **C.** probability density function of unweighted fragment lengths;  
 661 **D.** cumulative density function of unweighted fragment lengths; **E.** reversed cumulative density  
 662 function of unweighted fragment lengths; **F.** reversed cumulative density function of weighted  
 663 fragment lengths.

664

**1. Generate diploid reference sequences by inserting variants**

Reference CACATCTCCGAGCAATTTCTGGAATAAAT  
 Haplotype1 CACACCTCCGAGCAATTTATGGAAAAT  
 Haplotype2 CACATCTCTGAGGAATTTCTGGAATAAAT

- ✓ Download human reference genome (hg38)
- ✓ Insert SNVs from high-confidence regions of NA12878 from GIAB
- ✓ Insert 1 SNV per 1Kb to low-confidence regions of NA12878

**2. Simulate long DNA fragments**

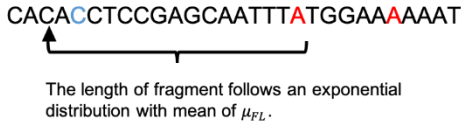

- ✓ Calculate the number of long DNA fragments:  $\frac{C_F * L}{\mu_{FL}}$
- ✓ Randomly select the fragment start positions
- ✓ Generate the fragment length from an exponential distribution with mean of  $\mu_{FL}$
- ✓ Merge all the simulated fragments from two haplotypes together

**3. Randomly allocate long DNA fragments into partitions, each partition is assigned a unique barcode.**

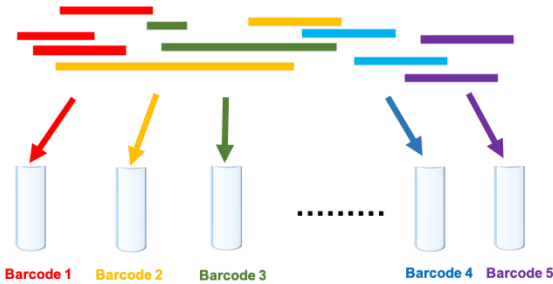

- ✓ The average number of fragments per partition is  $N_{F/P}$
- ✓ the number of fragments per partition follows a Poisson distribution with mean of  $N_{F/P}$ .

**4. Simulate paired-end short reads**

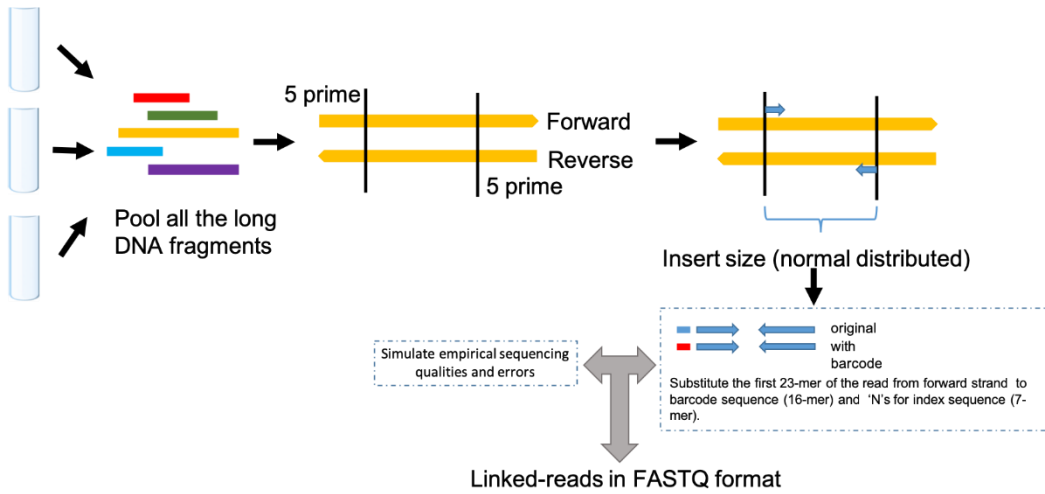

**5. Repeat step 1 to 4 with different parameters to simulate multiple libraries.**

665  
666

**Figure S9.** The workflow of LRTK-SIM to simulate linked-reads

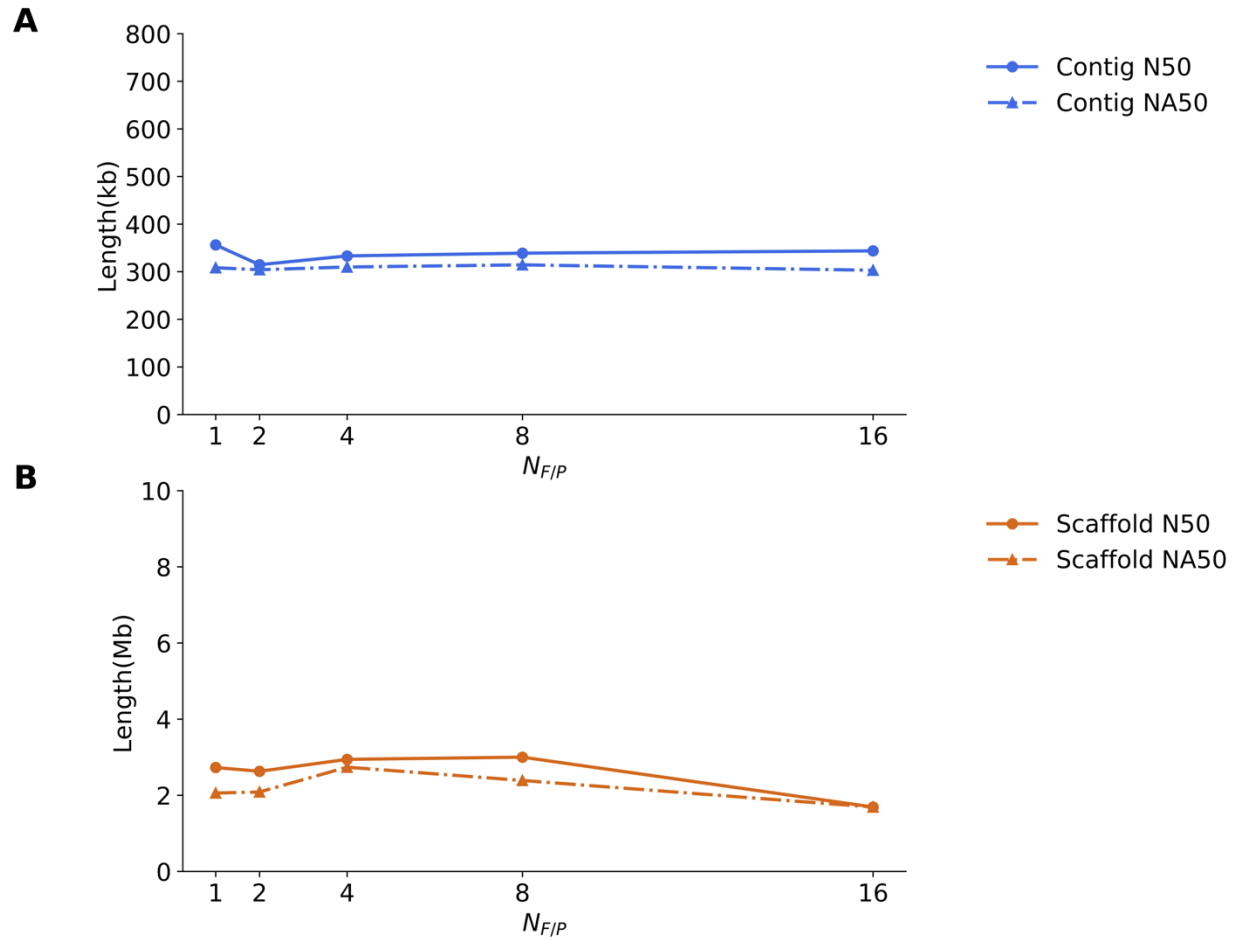

667

668 **Figure S10.** The effect of  $N_{F/P}$  on human diploid assembly of chromosome 19 by Supernova2,

669 where  $C$  ( $C=60X$ ;  $C_F=300X$  and  $C_R=0.2X$ ) and  $\mu_{FL}$  ( $\mu_{FL}=37\text{kb}$ ) are fixed.

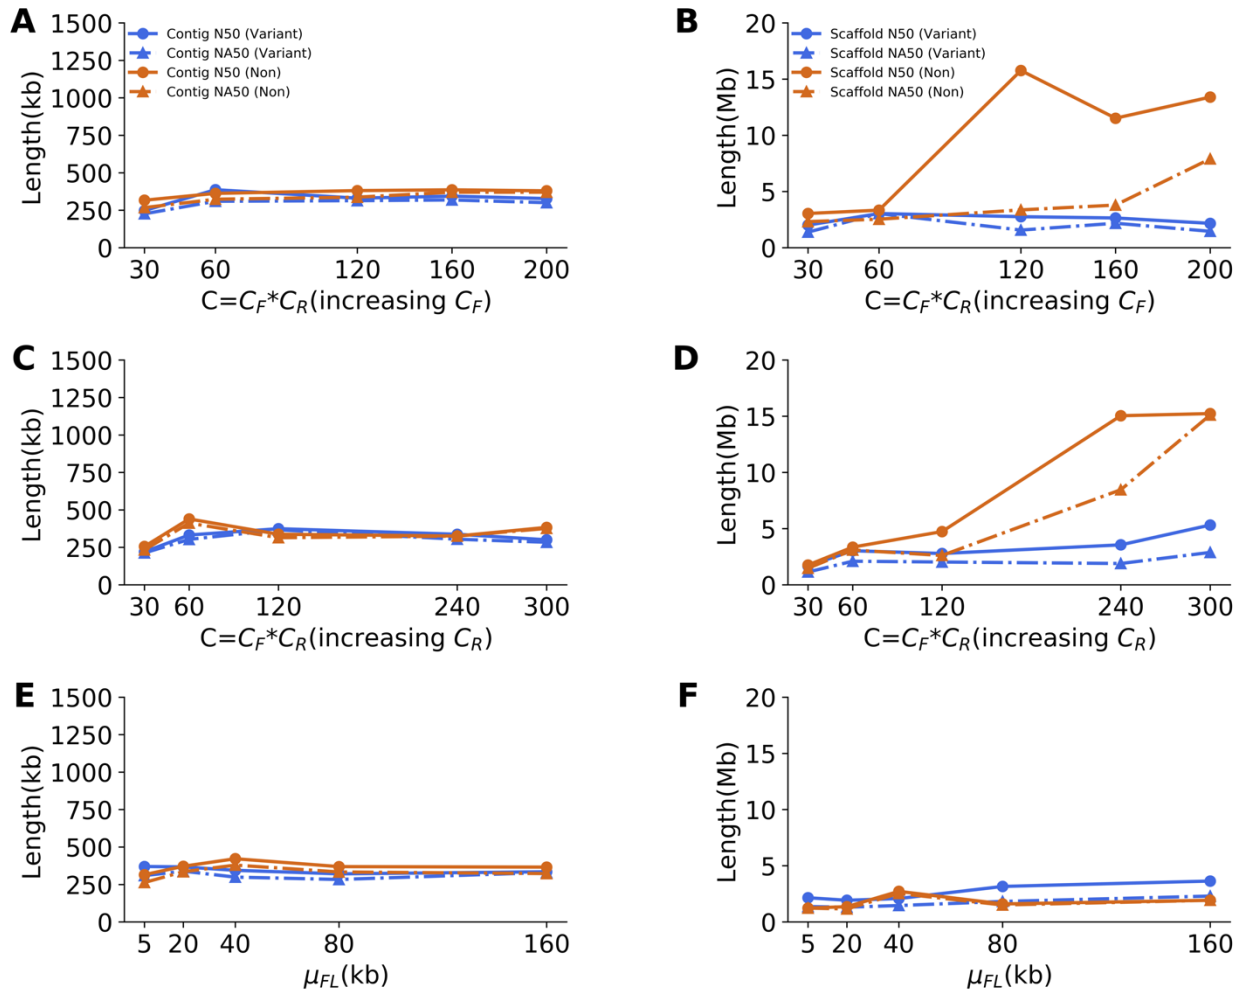

670  
 671  
 672  
 673

**Figure S11.** Comparison of assembly qualities from 10x data with and without single nucleotide variants by changing  $C_F$ ,  $C_R$  and  $\mu_{FL}$ .  $C_R$  was fixed to 0.2X in **A** and **B**;  $C_F$  was fixed to 300X in **C** and **D**;  $C_R$  was fixed 0.2X and  $C_F$  was fixed 300X in **E** and **F**.

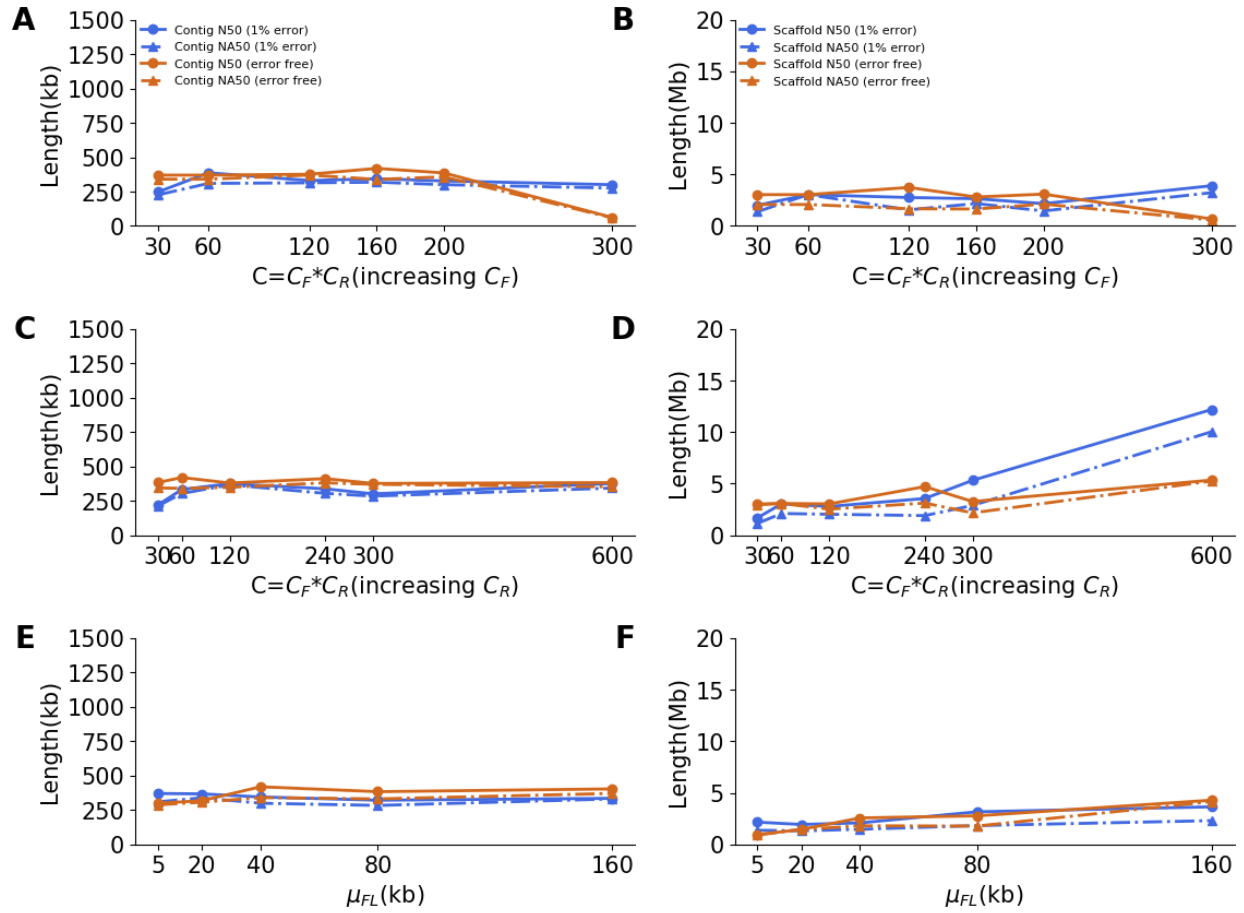

674

675

676

677

**Figure S12.** Comparison of assembly qualities from 10x data with (1% uniform) and without sequencing error by changing  $C_F$ ,  $C_R$  and  $\mu_{FL}$ .  $C_R$  was fixed to 0.2X in **A** and **B**;  $C_F$  was fixed to 300X in **C** and **D**;  $C_R$  was fixed 0.2X and  $C_F$  was fixed 300X in **E** and **F**.



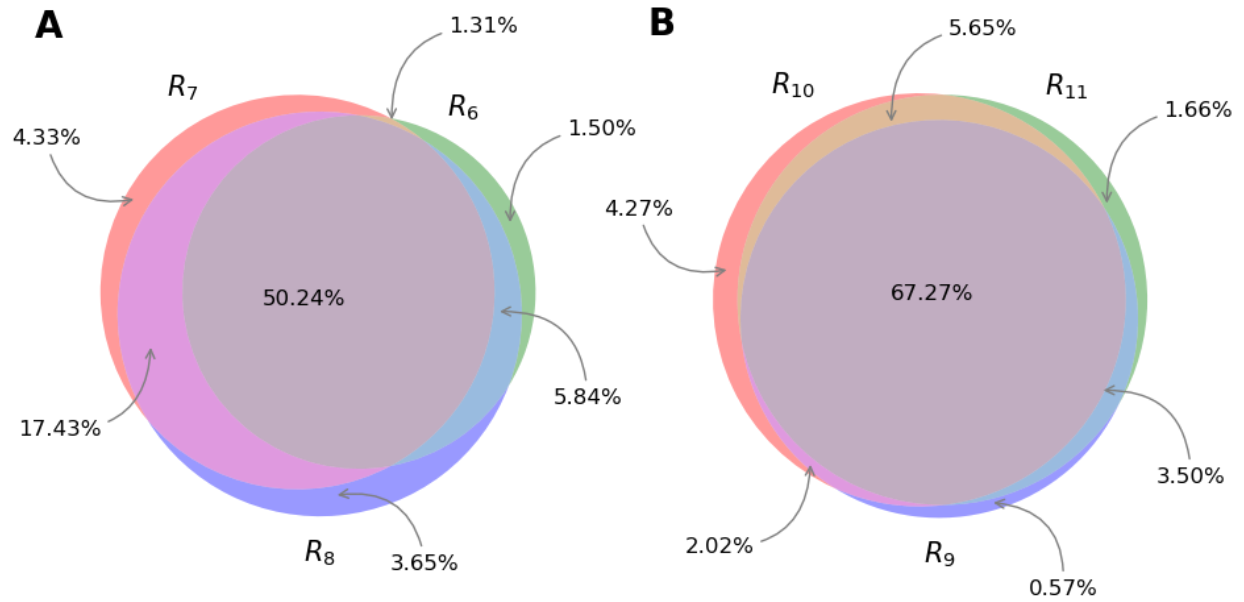

678  
679  
680  
681  
682

**Figure S13.** Overlaps of diploid regions for the three libraries from the same sample. Diploid regions for NA12878 (A) and NA24385 (B). The percentages denote the proportion of genome is diploid.

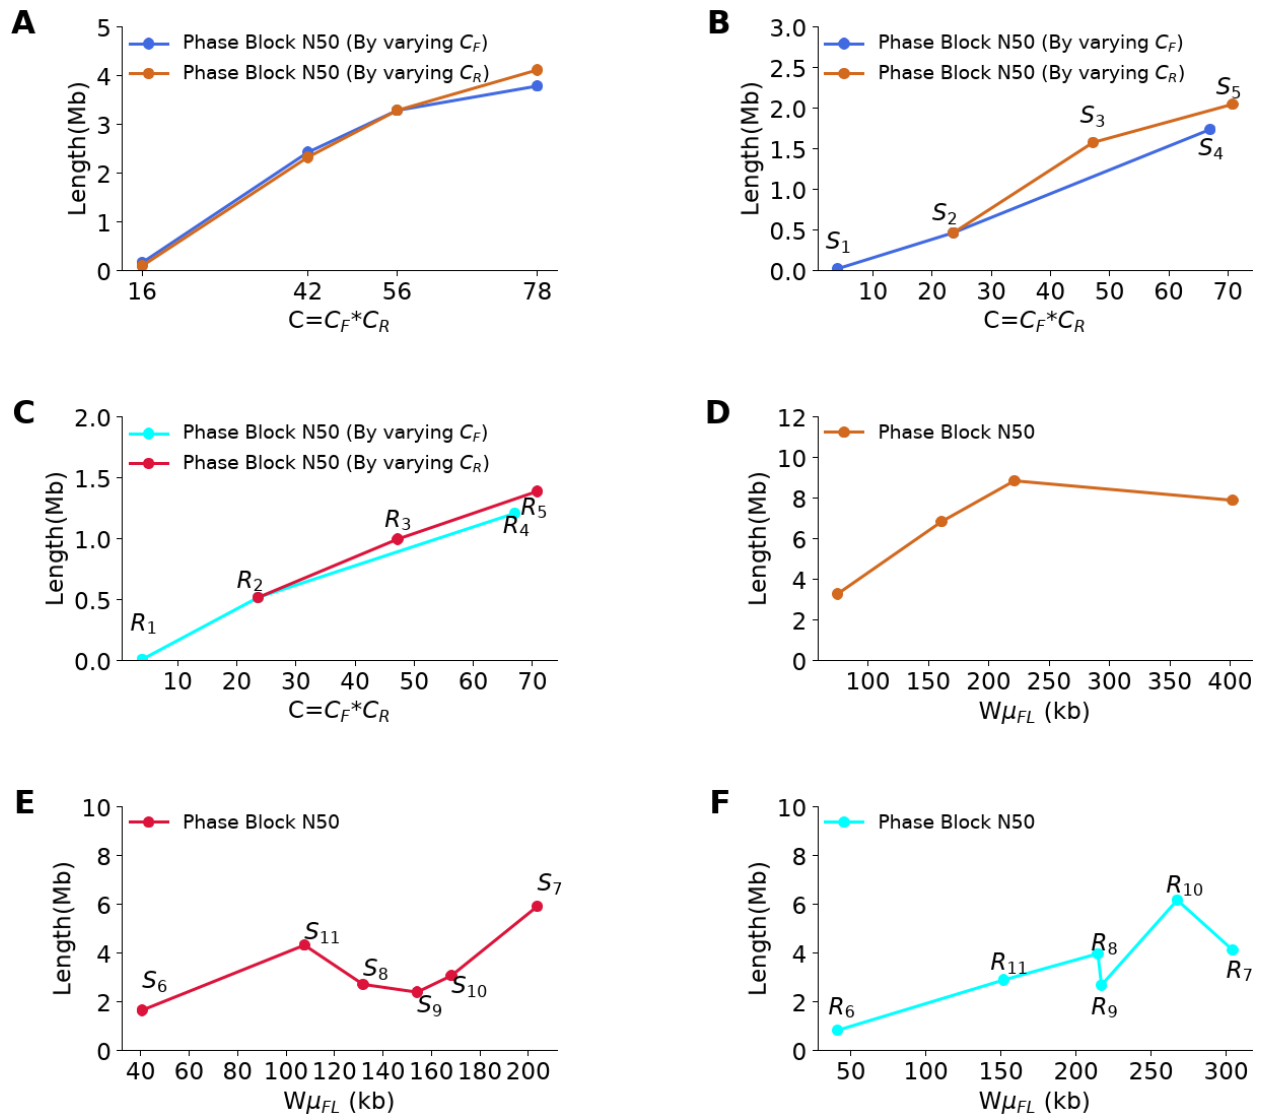

683  
684

685 **Figure S14.** Phase block N50s as a function of different parameter combinations. **A.** simulated  
686 Linked-Reads with predefined parameters by changing  $C_F$  and  $C_R$  (**Table S4**); **B.** simulated  
687 Linked-Reads with matched parameters of real linked-read sets (**Table S2**) by changing  $C_F$  and  
688  $C_R$ ; **C.** real Linked-Read sets (**Table S2**) by changing  $C_F$  and  $C_R$ ; **D.** simulated Linked-Read sets  
689 (**Table S3**) with different  $W\mu_{FL}$ ; **E.** simulated Linked-Read sets with matched parameters (**Table**  
690 **S3**) with real Linked-Read sets as  $C=56X$ ; **F.** real Linked-Read sets with  $C=56X$  (**Table S3**).

**Table**

| Linked-<br>reads set | Overall<br>(%) | Diploid<br>regions<br>(%) | Haploid<br>regions<br>(%) | Non-PAR<br>(%) | Total contig<br>length<br>(contig>500bp) | Length of contigs<br>from megabubble<br>(contig>500bp) | Percentage<br>(%) |
|----------------------|----------------|---------------------------|---------------------------|----------------|------------------------------------------|--------------------------------------------------------|-------------------|
| $R_6$                | 91.9           | 58.9                      | 27.7                      | -              | 5,632,483,053                            | 3,758,345,846                                          | 66.73             |
| $R_7$                | 91.1           | 73.3                      | 11.3                      | -              | 5,613,140,437                            | 4,668,186,478                                          | 83.17             |
| $R_8$                | 91.7           | 77.2                      | 9.2                       | -              | 5,635,127,471                            | 4,896,821,850                                          | 86.90             |
| $R_9$                | 91.3           | 73.4                      | 12.2                      | 85.9           | 5,637,615,919                            | 4,438,175,621                                          | 78.72             |
| $R_{10}$             | 91.7           | 79.2                      | 5.8                       | 79.9           | 5,749,001,471                            | 4,793,226,150                                          | 83.37             |
| $R_{11}$             | 91.7           | 78.1                      | 7.9                       | 87.6           | 5,677,566,094                            | 4,723,083,367                                          | 83.19             |

**Table 1.** Genomic coverage of contigs generated by Supernova2. Non-PAR: non-pseudoautosomal regions of X chromosome.  $R_6$ ,  $R_7$  and  $R_8$  are female;  $R_9$ ,  $R_{10}$  and  $R_{11}$  are male.

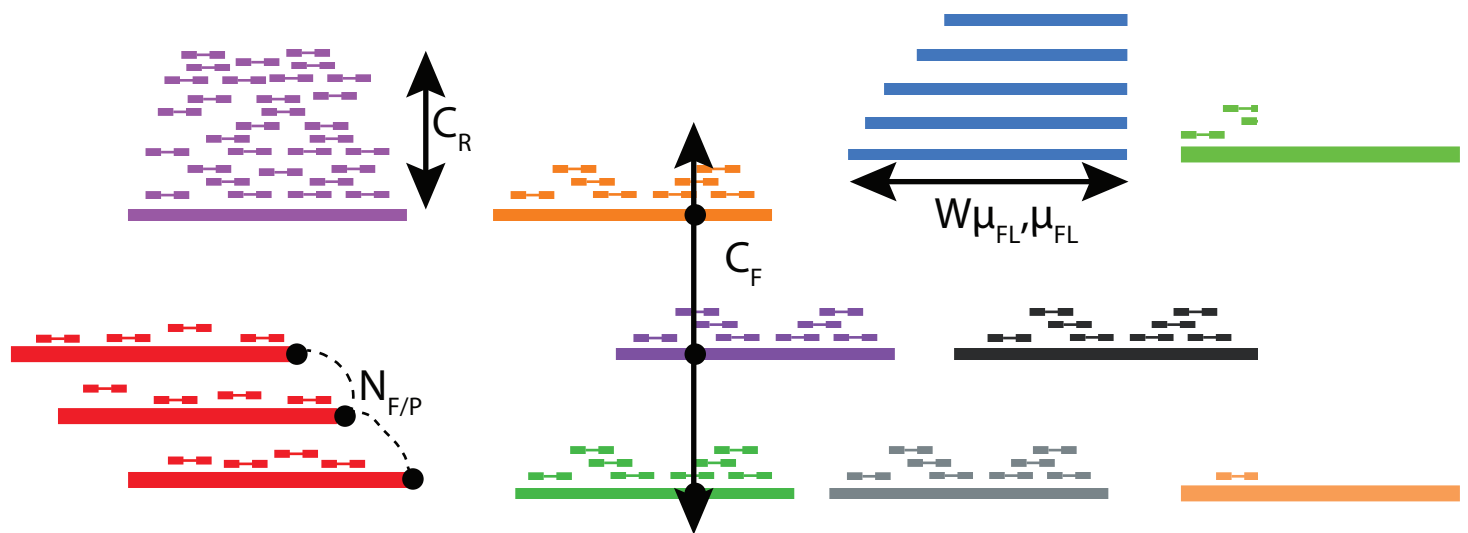**Parameter**

$N_{F/P}$  = Number of fragments per partition

$\mu_{FL}$  = Mean fragment length

$W\mu_{FL}$  = Weighted mean fragment length

$C_R$  = Read coverage per fragment

$C_F$  = Physical (fragment) coverage

$C$  = total coverage

**Typical values**

10 - 100

$\mu_{FL}$  = 10-100kb

$W\mu_{FL}$  = 20-400kb

$C_R$  = 0.1x - 0.4x

$C_F$  = 200x - 1000x

$C = C_R * C_F = 40x - 80x$

| Linked-read set<br>R (Real) / S (Simulated) | Sequenced<br>Library | $\mu_{FL}$<br>(kb) | $W\mu_{FL}$<br>(kb) | $C_F$<br>(X) | $C_R$<br>(X) | $C$<br>(X) |
|---------------------------------------------|----------------------|--------------------|---------------------|--------------|--------------|------------|
| $R_1 / S_1$                                 | $L_{1L}$             | 21.6               | 38.6/35.7           | 19           | 0.2          | 4          |
| $R_2 / S_2$                                 | $L_{1M}$             | 22.4               | 39.7/37.4           | 117          | 0.2          | 24         |
| $R_3 / S_3$                                 | $L_{1M}$             | 22.4               | 39.7/36.8           | 117          | 0.4          | 48         |
| $R_4 / S_4$                                 | $L_{1H}$             | 24.0               | 41.1/40.7           | 334          | 0.2          | 67         |
| $R_5 / S_5$                                 | $L_{1M}$             | 22.4               | 39.7/36.8           | 117          | 0.6          | 72         |
| $R_6 / S_6$                                 | $L_{1H}$             | 24.0               | 41.1/40.6           | 334          | 0.17         | 56         |
| $R_7 / S_7$                                 | $L_2$                | 79.0               | 304.3/131.8         | 123          | 0.45         | 56         |
| $R_8 / S_8$                                 | $L_3$                | 99.2               | 214.5/168.3         | 958          | 0.058        | 56         |
| $R_9 / S_9$                                 | $L_4$                | 92.1               | 216.9/154.1         | 1504         | 0.036        | 56         |
| $R_{10} / S_{10}$                           | $L_5$                | 120.8              | 267.4/203.7         | 208          | 0.27         | 56         |
| $R_{11} / S_{11}$                           | $L_6$                | 64.2               | 151.7/107.6         | 803          | 0.07         | 56         |

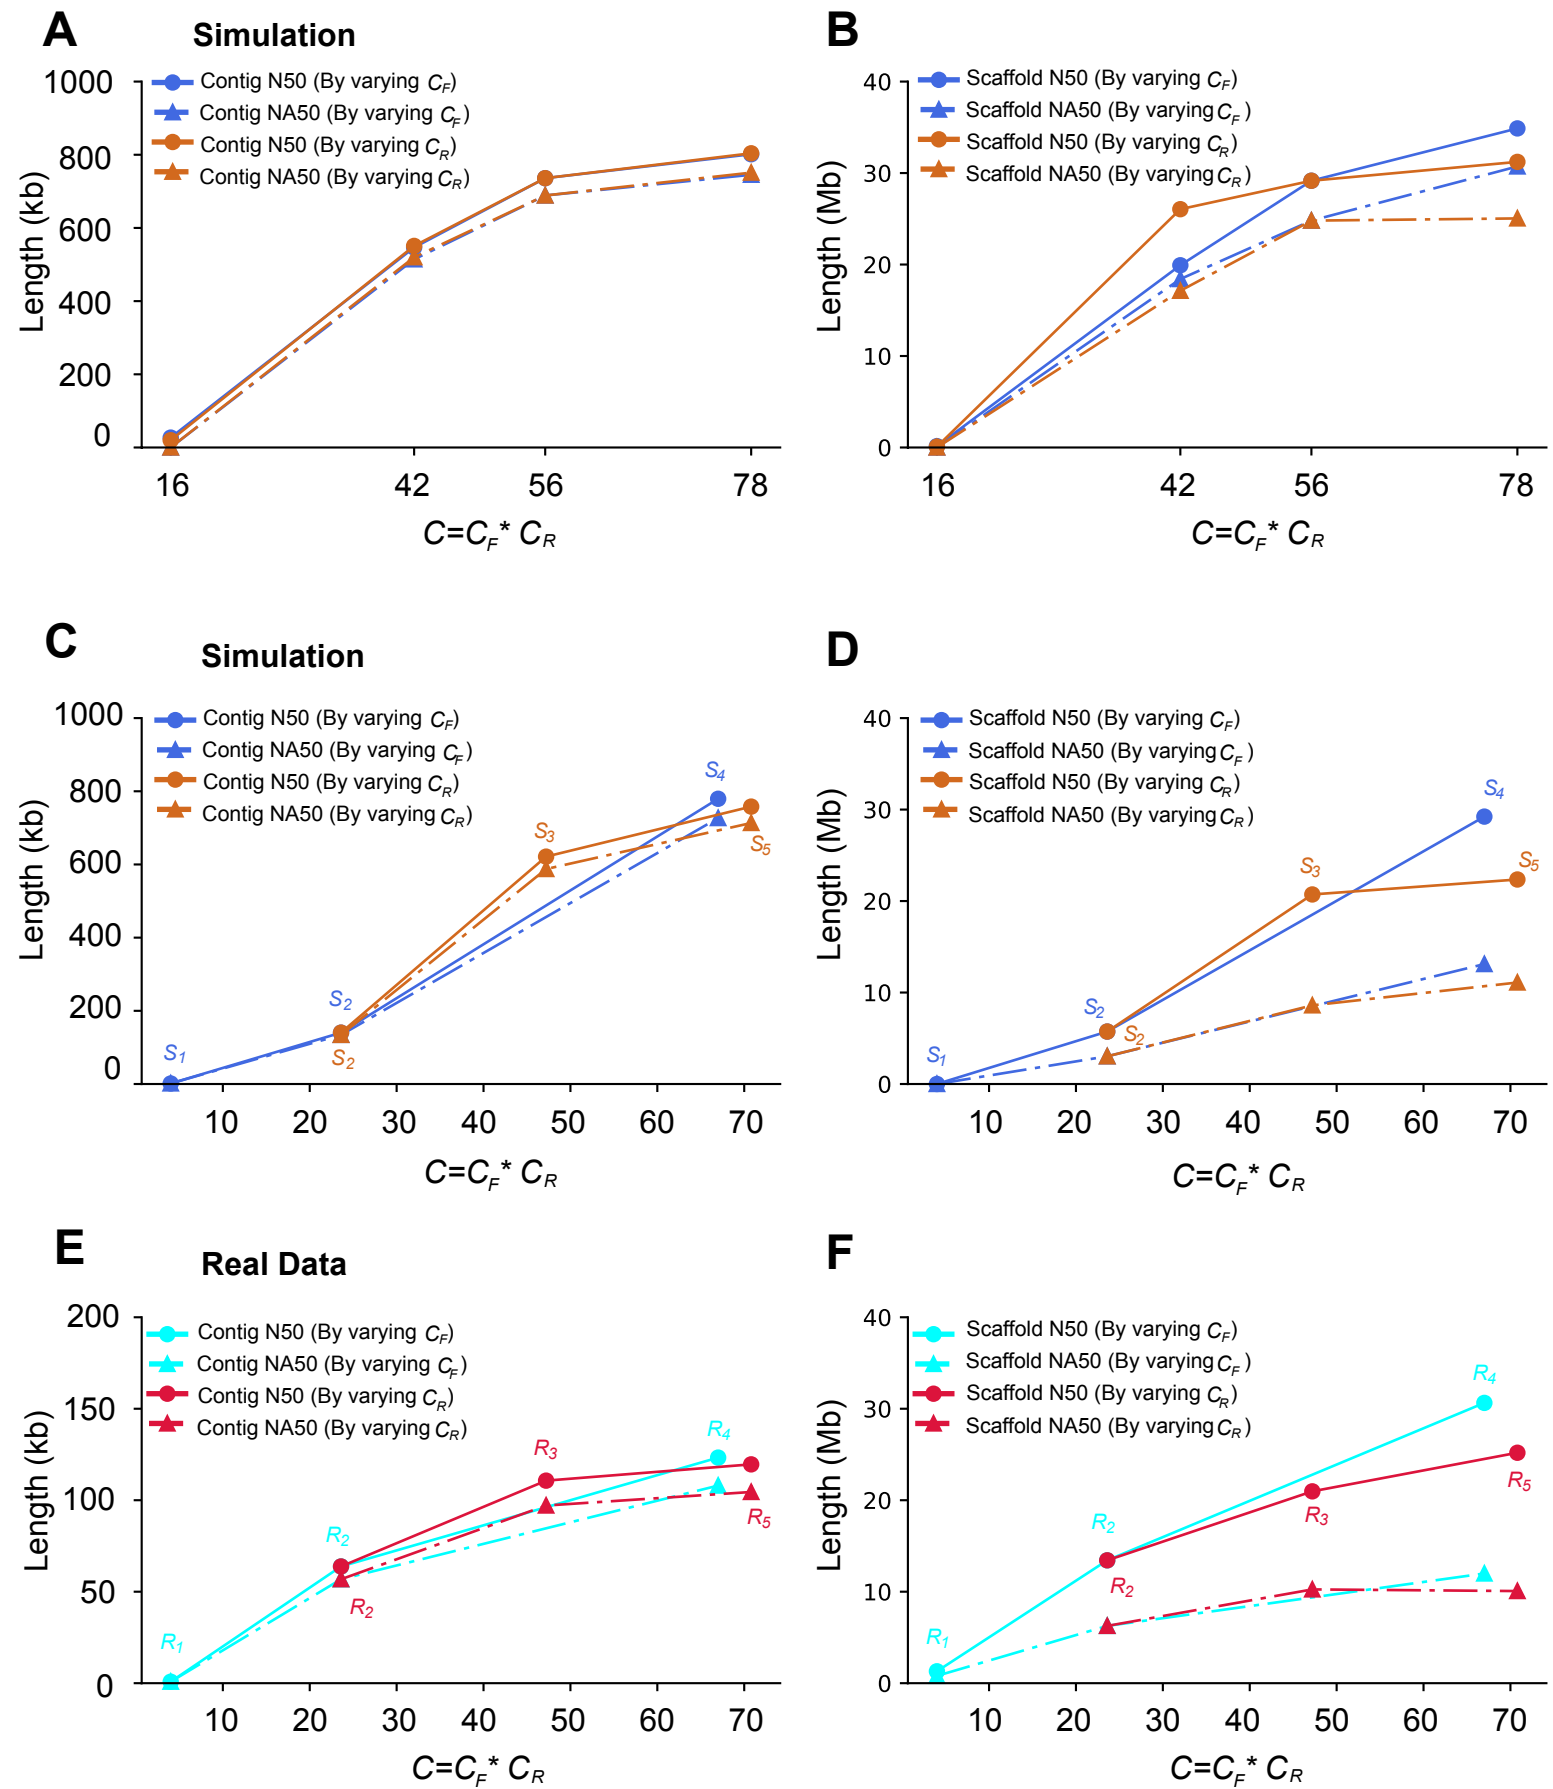

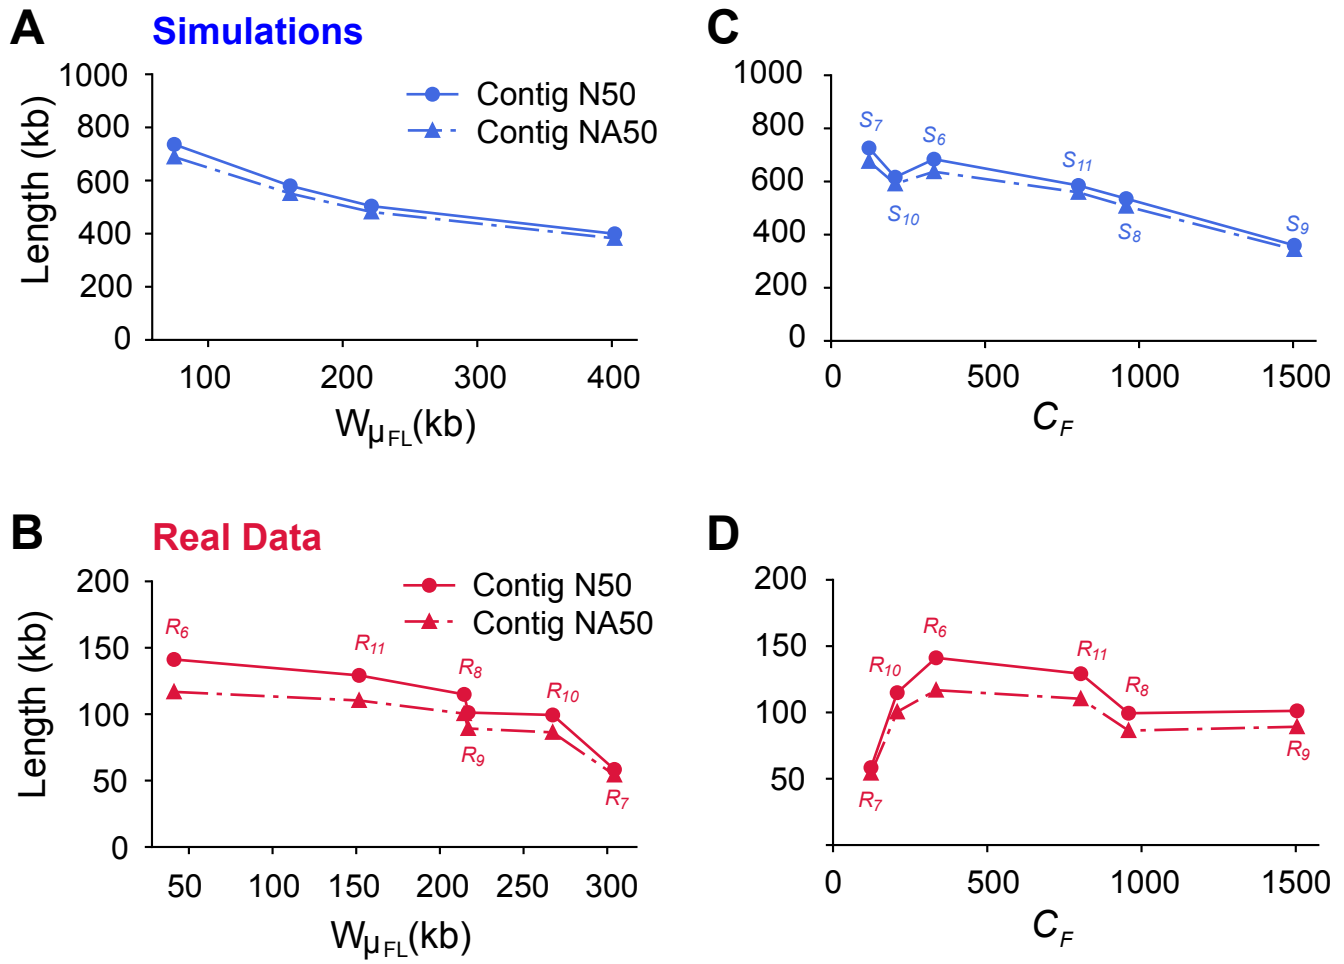

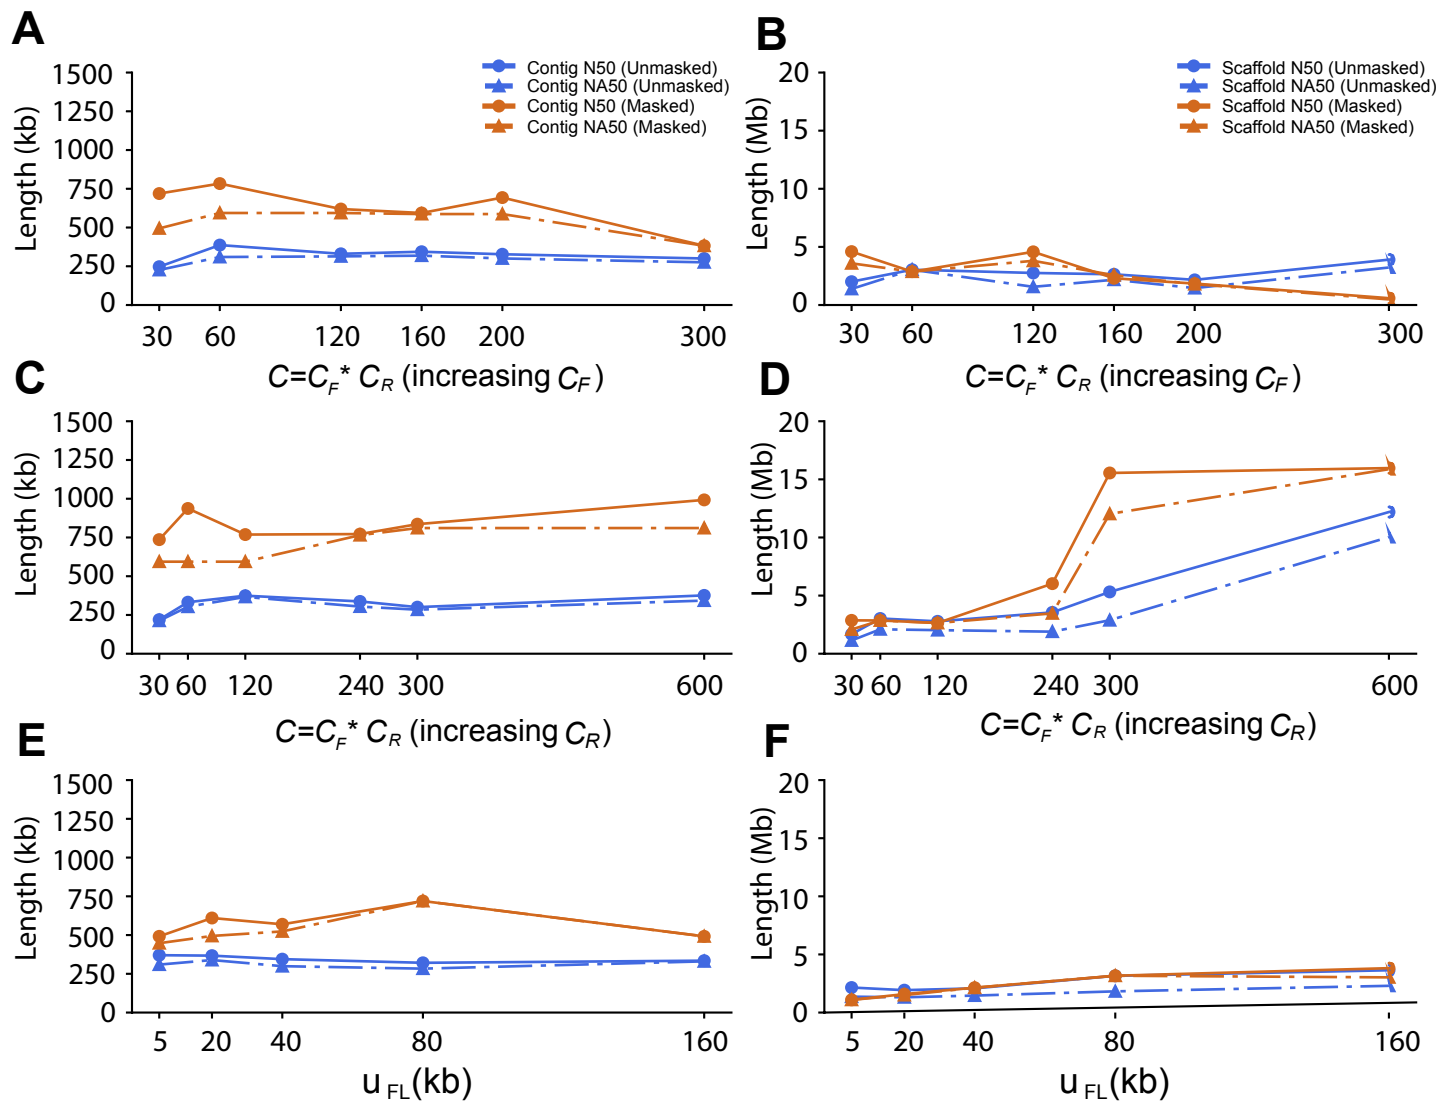



Click here to access/download  
**Supplementary Material**  
Supplementary Material.docx





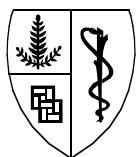

DEPARTMENT OF PATHOLOGY  
DEPARTMENT OF GENETICS  
STANFORD UNIVERSITY SCHOOL OF MEDICINE  
STANFORD, CA 94305-5324

Stanford, March 20, 2019

To: GigaScience Editors

Dear Editors,

We are pleased to submit our comprehensive study on *de novo* human genome assembly as a Data Note to GigaScience. *De novo* assembly has received renewed attention for human genomes due to the availability of long-read and Linked-Read approaches. While long-read approaches will remain prohibitively expensive in the foreseeable future and only useful for highly specialized applications, linked-read approaches are cost-effective for larger human cohorts. We therefore explored the experimental and computational parameter space for 10x-based linked read assemblies with Supernova2, the only currently available *de novo* assembler that makes use of linked reads data to produce a diploid assembly.

Beyond the results, which will be useful for a broad audience of scientists who are sequencing human personal genomes, we generated two resources and therefore suggest that our paper clearly fits the purpose of GigaSciences' Data Note. (1) We generated extensive and very deep sequence data on two reference cell lines, NA128787 and NA24385, that will be useful for methods developers in assembly and variation detection. (2) We developed the Linked-Read data simulator, LRTK-SIM, which allows software and applications developers to generate highly realistic linked-read data from a template reference genome.

Linked-Read data sets are still rare but given the potential of the approach and its cost-effectiveness we believe that we are addressing a research direction whose importance will only grow in the future. As we are the first to comprehensively address *de novo* assembly with Linked-Reads, we believe our study will have considerable impact. We hope you will find it sufficiently compelling to send it out for review.

Sincerely,

A handwritten signature in blue ink that reads "Arend Sidow".

Arend Sidow, Ph.D.  
Professor of Pathology and of Genetics  
SUMC R353  
Stanford, CA 94305-5324

arend@stanford.edu  
650-498-7024 (ph)  
<http://www.sidowlab.org>  
<http://jimb.stanford.edu>
